1 *Target journal:* Biotechnology for Biofuels

2 The isolate *Caproiciproducens* sp. 7D4C2 produces *n*-caproate at mildly  
3 acidic conditions from hexoses: genome and rBOX comparison with related  
4 strains and chain-elongating bacteria

5 Sofia Esquivel-Elizondo<sup>1</sup>, Caner Bağcı<sup>2,3</sup>, Monika Temovska<sup>4</sup>, Byoung Seung Jeon<sup>4</sup>, Irina  
6 Bessarab<sup>5</sup>, Rohan B. H. Williams<sup>5</sup>, Daniel H. Huson<sup>2</sup>, Largus T. Angenent<sup>1,4</sup>

7 <sup>1</sup> AG Angenent, Max Planck Institute for Developmental Biology, Max-Planck-Ring 5, 72076  
8 Tübingen, Germany.

9 <sup>2</sup> Algorithms in Bioinformatics, Department of Computer Science, University of Tübingen, Sand 14,  
10 72076 Tübingen, Germany.

11 <sup>3</sup> International Max Planck Research School "From Molecules to Organisms", Max Planck Institute  
12 for Developmental Biology and University of Tübingen, Max-Planck-Ring 5, Tübingen, 72076,  
13 Germany

14 <sup>4</sup> Environmental Biotechnology Group, Center for Applied Geosciences, University of Tübingen,  
15 Schnarrenbergstraße 94-96, 72076, Tübingen, Germany.

16 <sup>5</sup> Integrative Analysis Unit, Singapore Centre for Environmental Life Sciences Engineering, National  
17 University of Singapore, 28 Medical Drive, Singapore, 117456, Singapore.

18

## 19 Abstract

20 **Background.** Bulk production of medium-chain carboxylates (MCCs) with 6-12 carbon atoms is  
21 of great interest to biotechnology. Open cultures (e.g., reactor microbiomes) have been utilized  
22 to generate MCCs in bioreactors. When in-line MCC extraction and prevention of product  
23 inhibition is required, the bioreactors have been operated at mildly acidic pH (5.0-5.5). However,  
24 model chain-elongating bacteria grow optimally at neutral pH values. Here, we isolated a chain-  
25 elongating bacterium (strain 7D4C2) that thrives at mildly acidic pH. We studied its metabolism  
26 and compared its whole genome and the reverse  $\beta$ -oxidation (rBOX) genes to other bacteria.

27 **Results.** Strain 7D4C2 produces lactate, acetate, *n*-butyrate, *n*-caproate, biomass, and H<sub>2</sub>/CO<sub>2</sub>  
28 from hexoses. With only fructose as substrate (pH 5.5), the maximum *n*-caproate specificity  
29 (i.e., products *per* other carboxylates produced) was 60.9 ± 1.5%. However, this was  
30 considerably higher at 83.1 ± 0.44% when both fructose and *n*-butyrate (electron acceptor) were  
31 combined as a substrate. A comparison of serum bottles with fructose and *n*-butyrate with an  
32 increasing pH value from 4.5 to 9.0 showed a decreasing *n*-caproate specificity from ~92% at  
33 mildly acidic pH (pH 4.5-5.0) to ~24% at alkaline pH (pH 9.0). Moreover, when carboxylates  
34 were extracted from the broth (undissociated *n*-caproic acid was ~0.3 mM), the *n*-caproate  
35 selectivity (i.e., product *per* substrate fed) was 42.6 ± 19.0% higher compared to serum bottles  
36 without extraction. Based on the 16S rRNA gene sequence, strain 7D4C2 is most closely  
37 related to the isolates *Caproicibacter fermentans* (99.5%) and *Caproiciproducens*  
38 *galactitolivorans* (94.7%), which are chain-elongating bacteria that are also capable of lactate  
39 production. Whole-genome analyses indicate that strain 7D4C2, *C. fermentans*, and *C.*  
40 *galactitolivorans* belong to the same genus of *Caproiciproducens*. Their rBOX genes are  
41 conserved and located next to each other, forming a gene cluster, which is different than for  
42 other chain-elongating bacteria such as *Megasphaera* spp.

43 **Conclusions.** *Caproiciproducens* spp., comprising strain 7D4C2, *C. fermentans*, *C.*  
44 *galactitolivorans*, and several unclassified strains, are chain-elongating bacteria that encode a  
45 highly conserved rBOX gene cluster. *Caproiciproducens* sp. 7D4C2 (DSM 110548) was studied  
46 here to understand *n*-caproate production better at mildly acidic pH within microbiomes and has  
47 the additional potential as a pure-culture production strain to convert sugars into *n*-caproate.

## 49 Keywords

50 Chain elongation, *n*-caproate, lactate, reverse  $\beta$ -oxidation, rBOX genes, *Caproiciproducens*,  
51 *Caproicibacter*, chain-elongating bacteria, thiolase

## 52 Introduction

53 Medium-chain carboxylates (MCCs, 6-12 carbon atoms) are precursors to liquid fuels (Levy et  
54 al., 1981). Production of MCCs is, therefore, of great interest to biotechnology as a production  
55 platform for large volumes, especially since the substrate can be organic wastes or wastewater  
56 as part of the circular economy. MCCs are much easier to separate from the culture broth  
57 compared to short-chain carboxylates (SCCs, 2-5 carbon atoms) due to their hydrophobic  
58 carbon chains (Angenent et al., 2016; Levy et al., 1981; Xu et al., 2015). Besides their use for  
59 fuel production, MCCs are also feedstocks in the chemical, pharmaceutical, food, and  
60 agricultural industries for the manufacture of a wide variety of products (Desbois, 2012; Harvey  
61 & Meylemans, 2014; Kenealy et al., 1995; Levy et al., 1981). Moreover, MCCs are used for food  
62 preservation and sanitation due to their antimicrobial properties at low pH (Harroff et al., 2017).

63  
64 Carboxylates exist in an undissociated (carboxylic acid) and dissociated form (conjugate  
65 base, or carboxylate, plus a proton), depending on the pH of the bioreactor broth. At mildly  
66 acidic pH, specifically below the pKa (~4.9), the carboxylic acid is in the undissociated form. At  
67 pH values higher than the pKa, the acid dissociates and releases one proton, forming the  
68 conjugate base. The undissociated form of a carboxylate (*i.e.*, the carboxylic acid) is  
69 hydrophobic, which is essential for separation, but it is also lipophilic and crosses the microbial  
70 cell wall, creating antimicrobial properties. Inside the cell, where the pH is higher than in the  
71 bioreactor broth, the acid dissociates. As the conjugate base is lipophobic, it accumulates inside  
72 the cell, resulting in microbial inhibition (Russell, 1992). Based on this, *n*-caproate, which is a 6-  
73 carbon MCC (here referred to as the total of dissociated and undissociated forms), is toxic to  
74 microbes at pH values near its pKa (Agler et al., 2012a; Ge et al., 2015).

75  
76 Chain-elongating bacteria produce MCCs *via* the reverse  $\beta$ -oxidation (rBOX) pathway. In  
77 this strictly anaerobic process, electron donors, such as fructose, sucrose, lactate, or ethanol,

78 are oxidized into several acetyl-CoA molecules (2 carbons each). A certain fraction of these  
79 molecules is converted to produce acetate and energy. The other fraction of the acetyl-CoA  
80 molecules is used to elongate acetate or other SCCs (electron acceptors) in a cyclic process  
81 where two carbons are added at a time (**Figure 1**). In this manner, acetate (2 carbons) is first  
82 elongated to *n*-butyrate (4 carbons) and then to *n*-caproate (6 carbons). In some cases, *n*-  
83 caprylate (8 carbons) is produced (Kucek et al., 2016a; Kucek et al., 2016b; Spirito et al., 2014).  
84 When propionate is the electron acceptor, *n*-valerate (5 carbons) and *n*-heptanoate (7 carbons)  
85 are produced (Jeon et al., 2016). However, electron donors can also be used solely to produce  
86 MCCs (Jeon et al., 2010). The key enzymes involved in the rBOX pathway are thiolase (Thl;  
87 also named acetyl-CoA C-acetyltransferase), 3-hydroxybutyryl-CoA dehydrogenase (HBD),  
88 crotonase (Crt; also named 3-hydroxybutyryl-CoA dehydratase), acyl-CoA dehydrogenase  
89 (ACDH), electron transport flavoprotein (ETF), and acetate-CoA transferase (ACT) (**Figure 1**).

90  
91 Open cultures (e.g., reactor microbiomes) have been used to generate MCCs at high  
92 rates from various synthetic feeds and industrial and agricultural wastewaters, which are rich in  
93 carbon and electron equivalents such as sugar-rich and lactate-rich effluents (Contreras-Dávila  
94 et al., 2020; Duber et al., 2018; Kucek et al., 2016a; Xu et al., 2018). These bioreactors are  
95 operated: (1) at neutral pH to circumvent the accumulation of the undissociated form of the  
96 carboxylates, or (2) at mildly acidic pH (5.0-5.5) with in-line MCC extraction to recover the  
97 carboxylate product and to prevent product inhibition. The operation of bioreactors at mildly  
98 acidic pH values has the advantage of facilitating the extraction of MCCs from the culture broth  
99 because, at these pH values, MCCs have a low maximum solubility (Xu et al., 2015). Also, the  
100 low pH in open-culture bioreactors inhibits acetoclastic methanogenesis, which would be the  
101 main, but unwanted, electron shunting mechanism in reactors operated at neutral pH (Ge et al.,  
102 2015).

103

104 To increase the likelihood that MCC production in bioreactors with in-line extraction  
105 becomes an economic proposition as a biotechnology production platform, it is essential to  
106 study chain-elongating bacteria that thrive under mildly acidic conditions. A few chain-elongating  
107 bacteria have been isolated. *Clostridium kluyveri* is the most studied chain-elongating bacterium  
108 and known to utilize ethanol as the primary electron donor (Angenent et al., 2016). Other well-  
109 studied chain-elongating bacteria use carbohydrates (e.g., *Caproiciproducens galactitolivorans*,  
110 *Megasphaera hexanoica*, *Megasphaera elsdenii*, *Megasphaera indica*,) or lactate (e.g.,  
111 *Ruminococcaceae* bacterium CPB6 and *M. elsdenii*) as electron donors (Felicity A. Roddick &  
112 Britx, 1997; Jeon et al., 2016; Lanjekar et al., 2014; Marounek et al., 1989; Zhu et al., 2017).  
113 Recently, *Caproicibacter fermentans*, which is an *n*-caproate producer from carbohydrates, was  
114 isolated (Flaiz et al., 2020). While open cultures can effectively perform chain elongation at  
115 mildly acidic pH conditions with in-line MCCs extraction, strain CPB6 and *C. fermentans* are the  
116 only known chain-elongating bacteria that can satisfactorily produce MCCs at mildly acidic pH  
117 levels (Flaiz et al., 2020; Zhu et al., 2017).

118  
119 Whole-genome analyses combined with laboratory experiments are a powerful approach  
120 to study chain-elongating bacteria. While whole-genome alignments are necessary to assign  
121 taxonomy to novel microbes, the presence and location of genes give insights into their  
122 metabolism. The main objective of this work was to isolate and study the metabolism of a chain-  
123 elongating bacterium that thrives at mildly acidic pH (>4.5). To consider its potential application  
124 in bioreactors that are aimed at MCC production, we identified the environmental conditions that  
125 enhanced its *n*-caproate production. We sequenced and assembled its whole genome and  
126 compared it to other bacteria to assign taxonomy. We focused our comparisons on its closest  
127 isolated relatives *C. fermentans* (99.5% similar based on the 16S rRNA gene sequence) and *C.*  
128 *galactitolivorans* (94.71%), and also on unclassified strains. Moreover, we studied the genes

129 encoding rBOX proteins (rBOX genes) and compared them to those in: (1) close relatives; (2)  
130 bacteria with similar rBOX genes; and (3) known-chain-elongating bacteria.

131

## 132 **Results and Discussion**

133

### 134 **Strain 7D4C2 is a chain-elongating bacterium that converts sugars into *n*-caproate,** 135 **lactate, and H<sub>2</sub> at mildly acidic pH**

136 We cryogenically preserved a sample from an open-culture, chain-elongating bioreactor that  
137 was operated at a pH of 5.5 and 30°C and fed with ethanol and acetate in our previous  
138 laboratory at Cornell University in Ithaca, NY, USA (Spirito, Angenent, *et al.*, unpublished work).  
139 We revived the sample with ethanol (40 mM), acetate (4 mM), *n*-caproate (4 mM), and *n*-  
140 caprylate (4 mM) in basal medium that was buffered with 91.5 mM MES and supplemented with  
141 0.05% w/v yeast extract and vitamins (**Additional File 1: Figure S1**). To isolate chain-  
142 elongating bacteria, we serially diluted the culture and picked single colonies (pH 5.2, 30°C).  
143 Next, the selected colonies were cultured in a liquid medium and further diluted for purification.  
144 Since this liquid culture did not consume ethanol, we continued the purification process with  
145 fructose as the primary electron donor. The high concentration of MES, the mildly acidic pH  
146 (5.2), as well as the added fructose and electron acceptors (*n*-butyrate, *n*-caproate, and *n*-  
147 caprylate), inflicted strong selective pressures that allowed the relatively fast isolation  
148 (**Additional File 1: Figure S1**). Ultimately, the isolate that produced *n*-caproate and showed  
149 100% purity is referred to as strain 7D4C2 (DSM 110548). Strain 7D4C2 is a Gram-positive  
150 bacterium (**Additional File 1: Figure S2**) and rod-shaped (**Figure 2A,B**), which produces  
151 lactate, acetate, *n*-butyrate, *n*-caproate, biomass, and H<sub>2</sub> from hexoses at a pH of 5.5 (**Figure**  
152 **2C-E**). CO<sub>2</sub> is also produced (data not shown).

153

154 **The presence of different electron acceptors from 2 to 6 carbons influenced chain**  
155 **elongation by strain 7D4C2**

156 Short-chain carboxylates are commonly used as electron acceptors in chain elongation (Jeon et  
157 al., 2016; Wang et al., 2018). To study whether strain 7D4C2 was capable of utilizing even- and  
158 odd-chain electron acceptors, we grew the isolate at a temperature of 30°C and a pH of 5.5 with  
159 fructose ( $146.4 \pm 10.3 \text{ mmol C L}^{-1}$ ) and different carboxylates ( $108.2 \pm 8.0 \text{ mmol C L}^{-1}$ ) from 2 to  
160 6 carbons (*i.e.*, acetate, propionate, *n*-butyrate, *n*-valerate, and *n*-caproate) in separate serum  
161 bottles. For the control (fructose without an electron acceptor), strain 7D4C2 achieved a final  
162 average concentration of  $6.9 \pm 0.6 \text{ mmol C L}^{-1}$  for *n*-butyrate and  $57.5 \pm 2.4 \text{ mmol C L}^{-1}$  for *n*-  
163 caproate (**Figure 3A,B**), with an *n*-caproate specificity of  $60.9 \pm 1.5\%$  (*i.e.*, products *per* other  
164 carboxylates produced) (**Additional File 1: Table S1**). The presence of electron acceptors  
165 influenced the metabolism of strain 7D4C2. For acetate as the electron acceptor ( $13.8 \pm 8.1\%$   
166 uptake), the final average *n*-butyrate concentration was higher than the control ( $38.7 \pm 7.2 \text{ mmol}$   
167  $\text{C L}^{-1}$ ), while the *n*-caproate concentration was lower ( $40.3 \pm 15.4 \text{ mmol C L}^{-1}$ ), with an *n*-  
168 caproate specificity of  $44.1 \pm 5.9\%$  (**Figure 3A,C, Additional File 1: Table S1**). For propionate  
169 as the electron acceptor, the  $47.1 \pm 1.7\%$  uptake changed the metabolism from *n*-caproate to *n*-  
170 valerate production (compared to the control serum bottles) to reach a final average *n*-valerate  
171 concentration of  $76.5 \pm 0.4 \text{ mmol C L}^{-1}$ , although with a longer lag phase for fructose uptake  
172 (**Figure 3A,D**). This resulted in an *n*-caproate specificity of only  $2.79 \pm 0.5\%$  (**Additional File 1:**  
173 **Table S1**). Strain 7D4C2 achieved a higher *n*-caproate concentration for *n*-butyrate as the  
174 electron acceptor ( $53.3 \pm 1.1\%$  uptake) than for the control and the rest of carboxylates as  
175 electron acceptors, resulting in a total average concentration of  $125.5 \pm 1.9 \text{ mmol C L}^{-1}$  and an  
176 *n*-caproate specificity of  $83.1 \pm 44\%$  (**Figure 3A, Additional File 1: Table S1**). Previous studies  
177 with other chain-elongating bacteria have also observed the highest *n*-caproate specificities with  
178 *n*-butyrate (Jeon et al., 2016; Zhu et al., 2017). Moreover, the mmol-C ratio of produced *n*-  
179 caproate to lactate was higher at 20:1 for the serum bottles with *n*-butyrate than at 2:1 for the

180 control (**Figure 3A,E, Additional File 1: Table S1**). For *n*-valerate as the electron acceptor  
181 ( $10.1 \pm 0.7\%$  uptake), the final average lactate concentration was higher than the rest of the  
182 serum bottles ( $46.2 \pm 3.2 \text{ mmol C L}^{-1}$ ), and equivalent to the final average *n*-caproate  
183 concentration ( $44.3 \pm 5.3 \text{ mmol C L}^{-1}$ ), with an *n*-caproate specificity of  $41.4 \pm 3.3\%$  (**Figure**  
184 **3A,F, Additional File 1: Table S1**). We do not completely understand the reasons for these  
185 shifts in metabolism but know from theoretical calculations that the ratio of electron donor and  
186 electron acceptor has a large thermodynamic effect on product formation (Angenent et al.,  
187 2016). Lastly, for *n*-caproate as the electron acceptor, the initial total concentration of  $102.4 \pm$   
188  $0.5 \text{ mmol C L}^{-1}$  resulted in an undissociated *n*-caproic acid concentration of  $\sim 19.8 \text{ mmol C L}^{-1}$   
189 ( $\sim 3.3 \text{ mM}$ ) at a pH value of 5.5, which completely inhibited the metabolism of strain 7D4C2  
190 (**Figure 3A,G, Additional File 1: Table S1**).

191  
192 **The specificity of *n*-caproate production was higher at mildly acidic pH values while that**  
193 **of lactate was higher at alkaline pH levels**

194 Next, we investigated lactate and *n*-caproate production of strain 7D4C2 at a pH gradient: from  
195 mildly acidic to alkaline pH levels. For this, we cultured strain 7D4C2 at 30°C with a mixture of  
196 fructose ( $148.2 \pm 3.2 \text{ mmol C L}^{-1}$ ) and *n*-butyrate ( $112.2 \pm 6.3 \text{ mmol C L}^{-1}$ ) as the substrate at  
197 different initial pH values from 4.5 to 9.0 (**Figure 4**). We did not manually adjust the pH during  
198 the culture period, but we strongly buffered the serum bottles with 91.5 mM MES. The initial  
199 mildly acidic pH values from 4.5 to 5.5 favored the mmol-C ratio of produced *n*-caproate to  
200 lactate (lactate below detection at a pH value of 4.5 and 13:1  $\text{mmol C L}^{-1}$  at a pH value of 5.5),  
201 with final average *n*-caproate concentrations of 93.2 to 146.7  $\text{mmol C L}^{-1}$  (**Figure 4A**). The  
202 average *n*-caproate specificities for pH 4.5 to 5.2 were  $\sim 90\%$ , but the specificity decreased to  
203  $\sim 83\%$  for the pH 5.5 condition (**Additional File 1: Table S2**). At initial pH values higher than  
204 6.0, the mmol-C ratio of produced *n*-caproate to lactate gradually decreased to 0.4:1 at a pH  
205 value of 9.0. Strain 7D4C2 achieved a maximum average lactate concentration of 103.0  $\text{mmol C}$



206 L<sup>-1</sup> at a pH of 9.0 (**Additional File 1: Table S2**). In addition, strain 7D4C2 metabolized less and  
207 less *n*-butyrate across the increasing pH gradient (**Figure 4A**). Together, the changes in  
208 metabolism across the alkaline pH values led to a decrease in the final average *n*-caproate  
209 concentration from <76.0 to ~36.0 mmol C L<sup>-1</sup> for pH 7.0 to 9.0 (**Figure 4A**), resulting in a  
210 decrease in specificity from 37 to 23% (**Additional File 1: Table S2**). The H<sub>2</sub> production in  
211 mmol L<sup>-1</sup> did not follow the exact same trend of *n*-caproate specificity, but it was the highest at  
212 the low pH values of 5.2 and 5.5 (**Figure 4B**). We also cultured strain 7D4C2 at an initial pH of  
213 10.0, but it did not grow (data not shown).

214

### 215 **The optimum pH and temperature for *n*-caproate production differed for the growth rate**

216 As discussed in the previous section, strain 7D4C2 achieved the highest *n*-caproate specificity  
217 at mildly acidic pH values (4.5 – 5.2). However, at a pH of 4.5 and 5.0, the bacterium grew with  
218 an extended lag phase compared to the pH values 5.2 and 5.5 (**Additional File 1: Figures**  
219 **S3A,B and S4A**). Based on the high *n*-caproate specificity (~88.3%) and concentration (~3.1  
220 mmol C L<sup>-1</sup>) in combination with a high growth rate (0.5 d<sup>-1</sup>), the optimum pH value for improved  
221 *n*-caproate production was 5.2 (**Additional File 1: Table S2**). However, this pH value differed  
222 from the optimum pH value for growth, which was 6.0. At an initial pH of 6.0, the H<sub>2</sub> production  
223 rate, growth rate (1.3 d<sup>-1</sup>) (**Additional File 1: Figure S3A-D**), and fructose consumption rate  
224 (37.0 mmol C L<sup>-1</sup> d<sup>-1</sup>; **Additional File 1: Figure S4A-I, Table S2**) were the highest for this  
225 study, but the strain produced an equivalent mixture of *n*-caproate and lactate (2:1 mmol C L<sup>-1</sup>  
226 in **Additional File 1: Table S2**), resulting in a lower *n*-caproate specificity than at a pH of 5.2.

227

228 Similar to the experiment with different pH values, we investigated the optimum  
229 temperature for *n*-caproate production and growth with strain 7D4C2. For this, we grew the  
230 isolate with fructose and *n*-butyrate at different temperatures, ranging from 22.5°C to 50°C, and  
231 at a pH 6.0 (the optimum pH for growth) in separate serum bottles. We found that strain 7D4C2

232 achieved a maximum *n*-caproate specificity of ~67% at a temperature of 30°C (~107 mmol C L<sup>-1</sup>  
233 in **Additional File 1: Table S2**). However, similar to the pH optimum, the optimum temperature  
234 for *n*-caproate production differed for the growth rate, which was 37°C and 42°C. At these  
235 temperatures, the fructose consumption rate was 45.5 mmol C L<sup>-1</sup> d<sup>-1</sup>, compared to 27.3 mmol  
236 C L<sup>-1</sup> d<sup>-1</sup> at 30°C, and the H<sub>2</sub> production rate was the highest (**Additional File 1: Figure S3E-F**,  
237 **Figure S4J-N**).

238

### 239 **Product extraction increased the *n*-caproate selectivity at a pH of 5.2**

240 Bioreactors that were operated at mildly acidic pH with in-line product extraction have shown  
241 promising MCC production rates and yields (Agler et al., 2014; Ge et al., 2015; Kucek et al.,  
242 2016a; Kucek et al., 2016b; Spirito et al., 2018). Accordingly, we tested whether strain 7D4C2  
243 could achieve a higher *n*-caproate selectivity (*i.e.*, product *per* substrate fed) when the MCC  
244 was extracted during growth, avoiding the toxicity of the undissociated form at mildly acidic pH.  
245 For this, we cultured the bacterium with fructose (314.1 ± 2.1 mmol C L<sup>-1</sup>) and *n*-butyrate (101.3  
246 ± 3.2 mmol C L<sup>-1</sup>) as substrates, with product extraction and without product extraction (control)  
247 at a pH level of 5.2 and a temperature of 30°C. With the extraction of *n*-caproate, the average  
248 concentration of the undissociated MCC in the culture medium remained low at 0.3 ± 0.16 mM,  
249 while *n*-caproate production continued until all fructose was depleted by day 7 (**Figure 5D**,  
250 **Additional File 1: Figure S5B**). Without extraction, strain 7D4C2 reached the stationary growth  
251 phase by day 5 with substrate left over due to inhibition at an undissociated *n*-caproic acid  
252 concentration of 4.8 mM (**Figure 5A-C**, **Additional File 1: Figure S5A**). As a result, product  
253 extraction of *n*-caproate resulted in a 42.6 ± 19.0% higher *n*-caproate selectivity than the control  
254 without extraction (*i.e.*, 62.9 ± 39.7 mmol C L<sup>-1</sup> more *n*-caproate produced). These results  
255 indicate that *Caproiciproducens* sp. 7D4C2 has the potential as a chain-elongating production  
256 bacterium when extraction is desired for sugars as the electron donor.

257

258 **Strain 7D4C2 is closely related to unclassified *Clostridium* sp. W14A, *C. fermentans*,**  
259 **unclassified *Caproiciproducens* sp. NJN-50, and *C. galactitolivorans***

260 To assign taxonomy to strain 7D4C2, we sequenced its genome *via* long-read Nanopore  
261 sequencing. We obtained 117,171 reads, with an average length of 4,211 bp (N50 of 8772 bp)  
262 and a total size of 486Mb. The genome assembly resulted in a single, circular, and closed  
263 chromosome with a full length of 3,947,358 bp and a GC content of 51.6%. It was annotated  
264 with 3633 protein-coding genes (CDS), 13 rRNA genes (five 5S rRNA genes, four 16S rRNA  
265 genes, and four 23S rRNA genes), 60 tRNA genes, 4 ncRNA genes, 1 tmRNA gene, and 203  
266 pseudogenes (154 frameshifted genes). The assembly was 97.85% complete and 1.68%  
267 contaminated, according to CheckM (Parks et al., 2015). We aligned the whole genome against  
268 the NCBI-nt database. The strain is most similar to four known bacteria: (1) unclassified  
269 *Clostridium* sp. W14A (average nucleotide identity, ANI = 97.64; 82.28% aligned bases); (2) *C.*  
270 *fermentans* EA1 (ANI = 97.34; 81.20% aligned bases); (3) unclassified *Caproiciproducens* sp.  
271 NJN-50 (ANI = 78.52; 44.36% aligned bases); and (4) *C. galactitolivorans* BS-1 (ANI = 69.65;  
272 28.22% aligned bases) (**Additional File 1: Table S3**). The ANI values for the genome  
273 comparison of strain 7D4C2 with *Clostridium* sp. W14A and *C. fermentans* were higher than the  
274 cut-off value of 95 – 96% to define a novel species (~97.5%; **Additional File 1: Table S3**)  
275 (Richter & Rosselló-Móra, 2009; Yarza et al., 2014), which indicates that these three bacteria  
276 represent different strains of the same species.

277

278 To investigate further, we also compared the 16S rRNA gene sequences from strain  
279 7D4C2 with closely related bacteria. We identified four different 16S rRNA gene sequences  
280 (1517 – 1524 bp) in the genome of strain 7D4C2, which were 99.03% similar among them. To  
281 calculate phylogenetic distances with the other four bacteria, we aligned their 16S rRNA gene  
282 sequences (Project ID PRJNA615378) and the Sanger assembly for one of the 16S rRNA gene  
283 sequences in strain 7D4C2 (1287 bp, NCBI [MT056029](#)) against the NCBI-nt (National Center

284 for Biotechnology Information; <ftp://ftp.ncbi.nlm.nih.gov/blast/db/FASTA/> - accessed January  
285 2020). Since the 16S rRNA gene sequence for *Clostridium* sp. W14A was not publicly available,  
286 we annotated the genome for W14A and extracted the 16S rRNA gene sequence. The high-to-  
287 low similarities of the 16S rRNA gene sequence for strain 7D4C2 to the four bacteria were in the  
288 same order as when the genome alignment was compared: (1) unclassified *Clostridium* sp.  
289 W14A (100% similarity to the entire 16S rRNA gene sequence); (2) *C. fermentans* (99.51 ±  
290 0.25% similarity); (3) unclassified *Caproiciproducens* sp. NJN-50 (97.72 ± 0.31%); and (4) *C.*  
291 *galactitolivorans* (94.71 ± 0.35% similarity) (**Additional File 1: Figure S6**). A cross comparison  
292 for *Clostridium* sp. W14A and *C. fermentans* to *C. galactitolivorans* showed us a 94.83%  
293 similarity between *Clostridium* sp. W14A and *C. galactitolivorans*, and a 94.90% similarity  
294 between *C. fermentans* and *C. galactitolivorans*, which is slightly outside the quantitative  
295 window to group all four strains within a single genus (Yarza et al., 2014). Thus, based on both  
296 the genome alignment and 16S rRNA gene sequence comparisons, strain 7D4C2 and its four  
297 closest related bacteria are not all strains of the same species, but likely they are all members of  
298 the same genus of *Caproiciproducens* spp.. This would mean that *C. fermentans*  
299 (*Caproicibacter fermentans*) would need to be re-classified as *Caproiciproducens fermentans*.

300

301 **The percentage of conserved proteins also suggest that strain 7D4C2, *C. fermentans*,**  
302 **and *C. galactitolivorans* belong to the same genus, but not the same species**

303 To further study whether strain 7D4C2 and its closest related bacteria are members of a single  
304 species or a single genus, we calculated the percentage of conserved proteins (POCP) for  
305 strain 7D4C2, *C. fermentans*, *C. galactitolivorans*, and their closely related unclassified strains  
306 (*i.e.*, *Clostridium* sp. W14A, *Caproiciproducens* sp. NJN-50, and *Clostridium* sp. KNHs216).  
307 Besides *Clostridium* sp. KNHs216, we also included additional selected species from the  
308 Clostridiales (according to the NCBI Taxonomy Database; heterotypic synonym of  
309 Eubacteriales) for this analysis (those with the highest ANI values with strain 7D4C2,

310 **Additional File 1: Table S3**). Qin et al. 2014 have suggested that species within the same  
311 genus share at least half of their proteins, and therefore their pairwise POCP values are higher  
312 than 50% within a clade (Qin et al., 2014). As anticipated from the above results, the pairwise  
313 POCP values among strain 7D4C2, *Clostridium* sp. W14A, and *C. fermentans* were high (83.4 –  
314 87.5%). These three bacteria formed a clade with pairwise POCP values higher than 51.7% with  
315 *C. galactitolivorans* and the closely related unclassified strains (*i.e.*, *Caproiciproducens* sp. NJN-  
316 50 and *Clostridium* sp. KNHs216), suggesting that all these bacteria belong to the same genus  
317 (Qin et al., 2014) (**Figure 6A**). However, strain 7D4C2, *Clostridium* sp. W14A, *C. fermentans*,  
318 and *Caproiciproducens* sp. NJN-50 (POCP: 61.3 - 87.5%) separated into a different sub-clade  
319 from *C. galactitolivorans* and *Clostridium* sp. KNHs216 (POCP: 59.7%) (**Figure 6A**). The former  
320 sub-clade with strain 7D4C2 separated again into two clades with *Caproiciproducens* sp. NJN-  
321 50 as the sole strain. Strain 7D4C2, *Clostridium* sp. W14A, and *C. fermentans* are very similar  
322 strains and form a separate species based on this analysis and the genome alignment  
323 comparison.

324  
325 In addition, we followed the approach that was suggested by Barco et al. (2020) to  
326 demarcate genera based on the relation between genome indices and the distinction of type-  
327 and non-type species. We used the average nucleotide identity of protein-coding genes and the  
328 genome aligned fraction (AF) as considered indices (Barco et al., 2020). For this analysis, we  
329 chose *C. galactitolivorans* as a reference bacterium and compared its genome relatedness  
330 index (the relation between ANI and AF) to strain 7D4C2, *C. fermentans*, and its three closely  
331 related unclassified strains (*i.e.*, *Clostridium* sp. W14A, *Caproiciproducens* sp. NJN-50, and  
332 *Clostridium* sp. KNHs216), as well as the type species of each genus within the family  
333 *Ruminococcaceae* (according to the NCBI Taxonomy Database; heterotypic synonym of  
334 *Oscillibacteriaceae*). Results from this analysis supported our other analyses: strain 7D4C2  
335 clustered closely with *Clostridium* sp. W14A, *C. fermentans*, and *Caproiciproducens* sp. NJN-50

336 **(Figure 6B)** at higher ANI and AF values than the type species, indicating the similarity to *C.*  
337 *galactitolivorans*. We found still higher ANI and AF values for *Clostridium* sp. KNHs216, which  
338 indicates a closer similarity to *C. galactitolivorans* than the other four bacteria **(Figure 6B)**. The  
339 clear separation between strain 7D4C2, *C. fermentans*, and the three unclassified strains from  
340 the type species within the *Ruminococcaceae* suggests that neither of these species represents  
341 a novel genus, but that they are all members of the *Caproiciproducens*. This differentiation  
342 further suggests that strain 7D4C2, *C. fermentans*, and closely related unclassified bacteria are  
343 not type-species of a novel genus within their taxonomic family, but that they are part of the  
344 *Caproiciproducens*.

345

346 **Strain 7D4C2, *C. fermentans*, and *C. galactitolivorans* belong to the same genus based**  
347 **on their phenotype**

348 To further validate that strain 7D4C2, *C. fermentans*, and *C. galactitolivorans* are members of  
349 the genus *Caproiciproducens*, we cultured strain 7D4C2, *C. galactitolivorans*, and [*Clostridium*]  
350 *leptum* under similar conditions (*i.e.*, complex medium, 37°C, pH of 7.0) and compared the  
351 products from glucose fermentation. We chose [*Clostridium*] *leptum* as our reference, because it  
352 is the closest isolate to *C. galactitolivorans* (Kim et al., 2015), and it is closely related to strain  
353 7D4C2 **(Additional File 1: Figure S6)**. We then compared our results to those reported for *C.*  
354 *fermentans* EA1 in Flaiz *et al.* Both strain 7D4C2 and *C. galactitolivorans* produced lactate,  
355 acetate, *n*-butyrate, *n*-caproate, and H<sub>2</sub>/CO<sub>2</sub>, although at different proportions **(Additional File**  
356 **1: Figure S7)**. Final average lactate and *n*-caproate concentrations in serum bottles with strain  
357 7D4C2 were higher than in serum bottles with *C. galactitolivorans*; the lactate concentration was  
358 10.1 ± 0.7 mmol C L<sup>-1</sup> higher, and the *n*-caproate concentration was 29.1 ± 0.5 mmol C L<sup>-1</sup>  
359 higher **(Additional File 1: Figure S7A)**. Similarly, the final average *n*-caproate concentration in  
360 serum bottles with strain 7D4C2 was 36.1 ± 1.1 mmol C L<sup>-1</sup> higher than in serum bottles with *C.*  
361 *galactitolivorans* in a supplemented basal medium at 37°C and a pH of 6.0 (data not shown).

362 [C]. *leptum* did not produce lactate nor *n*-caproate, and only ethanol and acetate were detected  
363 in the serum bottles (**Additional File 1: Figure S7A**). All three strains produced H<sub>2</sub>, but H<sub>2</sub>  
364 production by *C. galactitolivorans* was the highest (**Additional File 1: Figure S7B**). Similar to  
365 strain 7D4C2 and *C. galactitolivorans*, *C. fermentans* also produced lactate, acetate, *n*-butyrate,  
366 *n*-caproate, and H<sub>2</sub>/CO<sub>2</sub> from hexoses (Flaiz et al., 2020).

367

368 To identify phenotypic differences between strain 7D4C2, *C. fermentans*, and *C.*  
369 *galactitolivorans*, we studied the carbohydrate utilization of strain 7D4C2 using the AN  
370 MicroPlate™ from Biolog (Hayward, CA) (**Additional File 1: Figure S8**) and we compared the  
371 results to those reported for *C. fermentans* (Flaiz et al., 2020) and *C. galactitolivorans* (Kim et  
372 al., 2015). From the seven carbohydrates compared between strain 7D4C2 and *C. fermentans*,  
373 all but glycerol (oxidized by strain 7D4C2 and *C. galactitolivorans*) and D-galactose (oxidized by  
374 *C. fermentans* and *C. galactitolivorans*) showed similar utilization (**Additional File 1: Table S4**).  
375 The carbohydrate utilization by strain 7D4C2 and *C. galactitolivorans* differed in 13 out of 30  
376 carbohydrates compared (**Additional File 1: Table S4**). Other differential characteristics  
377 between strain 7D4C2, *C. fermentans*, *C. galactitolivorans*, and [C.] *leptum* included optimal pH  
378 and temperature and genome length (**Table 1**).

379

380 In general, our work shows that strain 7D4C2 and *C. fermentans* have a similar  
381 phenotype to *C. galactitolivorans*. Therefore, also based on the ~5% dissimilarity between their  
382 16S rRNA gene sequences and the >51.7% shared conserved proteins, we propose that: (1)  
383 strain 7D4C2, the unclassified *Clostridium* sp. W14A, *C. fermentans*, the unclassified  
384 *Caproiciproducens* sp. NJN-50, *C. galactitolivorans*, and the unclassified *Clostridium* sp.  
385 KNHs216 belong to the genus *Caproiciproducens*; and (2) strain 7D4C2, the unclassified  
386 *Clostridium* sp. W14A, and *C. fermentans*, are very similar strains of a new species within the

387 *Caproiciproducens*. We propose *Caproiciproducens fermentans* as the name for these three  
388 strains based on the work by Flaiz et al. (2020).

389

390 **The six rBOX genes in *Caproiciproducens* species are located next to each other,**  
391 **forming a gene cluster**

392 To further study the chain-elongation metabolism of strain 7D4C2, we identified the rBOX genes  
393 (*thl*, *hbd*, *crt*, *acdH*, and *etf- $\alpha$*  and - $\beta$ ; **Figure 1**) in its genome and we compared them to those  
394 in: (1) closely related bacteria (*i.e.*, the proposed *Caproiciproducens* species); (2) bacteria with  
395 similar rBOX genes (*i.e.*, *Anaeromassilibacillus senegalensis*, *Eubacterium limosum*, and  
396 several *Clostridium* species); and (3) well known chain-elongating bacteria (*i.e.*, *C. kluyveri*,  
397 *Oscillibacter valerigenes*, unclassified *Ruminococcaceae* CPB6, *M. hexanoica*, and *M. elsdenii*).  
398 The number of copies for each gene varied from 1 to 14 for the included bacteria (**Additional**  
399 **File 2**). The genomes of strain 7D4C2, unclassified *Clostridium* sp. W14A, and *C. fermentans*  
400 EA1 have two copies for *thl*, 2-3 copies for *acdH* and *etf- $\alpha$* , three copies for *etf- $\beta$* , and one copy  
401 for *hbd* and *crt*. Differently, *Caproiciproducens* sp. NJN-50 and *Clostridium* sp. KNHs216  
402 encode several copies for each rBOX gene, and *C. galactitolivorans* has only one copy for each  
403 gene (**Additional File 2**). In general, the genomes of the analyzed bacteria contain multiple  
404 copies for some or all of the rBOX genes. However, *C. galactitolivorans*, *A. senegalensis*, and  
405 uncultured *Ruminococcaceae* CPB6 only contain a single copy (**Additional File 2**).

406

407 One copy for each of the rBOX genes (*thl*, *hbd*, *crt*, *acdH*, and *etf- $\alpha$*  and - $\beta$ ) in strain  
408 7D4C2 are located next to each other, forming a 5,903-base pair-long gene cluster (**Figure 7A**).  
409 We observed the same synteny of the rBOX cluster for the genomes of bacteria that are closely  
410 related to the *Caproiciproducens*. Similarly, this synteny was found for *A. senegalensis*, which is  
411 not known as a chain elongator, and *E. limosum*, which is an acetate and *n*-butyrate producer  
412 (Park et al., 2017; Roh et al., 2011), and which is capable of *n*-caproate production at high *n*-



413 butyrate concentrations (Lindley et al., 1987) (**Figure 7A**). The arrangement of the rBOX genes  
414 varied for other bacteria. For the *Clostridium* species (*i.e.*, *Clostridium jeddahense*, *Clostridium*  
415 *sporosphaeroides*, *Clostridium minihomine*, and *Clostridium merdae*), which are not known to  
416 produce *n*-caproate, the rBOX gene cluster is separated; *thl* and *hbd* form one cluster and *crt*,  
417 *acdH*, *etf- $\alpha$* , and *etf- $\beta$*  form a separate cluster, approximately 5 kbp away from each other and on  
418 the opposite strand (**Figure 7A, Additional File 2**). For the well-known chain-elongating  
419 bacteria *C. kluyveri* and *O. valericigenes* (an *n*-valerate producer (Lino et al., 2007)), their  
420 genomes have one copy of five rBOX genes (all but *thl*) in synteny (**Figure 7A**). The *thl* genes in  
421 these two chain-elongating bacteria are separated from the rest of the rBOX genes. The three  
422 thiolase genes in *C. kluyveri* form a separate cluster 658,054 bp away from the rBOX cluster  
423 (**Additional File 2**). In *Ruminococcaceae* bacterium CPB6, *acdH*, *etf- $\alpha$* , and *etf- $\beta$*  cluster  
424 together, while *thl*, *hbd*, and *crt* cluster further away (924,173 bp) from the first three genes  
425 (**Figure 7A and Additional File 2**). The rBOX genes of *M. hexanoica* and *M. elsdenii* are not in  
426 an apparent synteny, although those of *M. hexanoica*, except *thl*, are close to each other  
427 (**Additional File 2**). More work is required to understand whether an advantage exists for chain-  
428 elongating bacteria with a gene cluster for rBOX genes compared when these genes are  
429 located separately on the genome.

430

431 **The rBOX genes in strain 7D4C2 are mostly similar to those in *Caproiciproducens***  
432 **species and relatively distant to those in other chain-elongating bacteria**

433 We built individual gene trees with the 6 rBOX genes and a consensus tree out of them in strain  
434 7D4C2, closely related bacteria, bacteria with similar rBOX genes, and known chain-elongating  
435 bacteria. As the gene copies varied for different bacteria, we included in the analyses the rBOX  
436 genes that are located close to each other (forming a cluster) or that are most similar to those in  
437 strain 7D4C2 (**Additional File 2**). The analysis showed that the rBOX genes of strain 7D4C2  
438 are identical to those of *Clostridium* sp. W14A and *C. fermentans*. In general, these genes are

439 very similar to those of other members of the POCP clade (*i.e.*, *Caproiciproducens* sp. NJN-50,  
440 *C. galactitolivorans*, and *Clostridium* sp. KNHs216; **Figure 6A**) (**Figure 7B**). The rBOX genes of  
441 strain 7D4C2 are also similar to those of less closely related bacteria, such as *A. senegalensis*  
442 and *E. limosum*, but relatively distant to those of other chain-elongating bacteria (*i.e.*, *C.*  
443 *kluuyveri*, *O. valerigenes*, *Ruminococcaceae* bacterium CPB6, *M. hexanoica*, and *M. elsdenii*)  
444 (**Figure 7B**).

445  
446 The individual gene trees showed that the phylogenetic distance between the rBOX  
447 genes of strain 7D4C2 and related bacteria varies for each gene. Nonetheless, the rBOX genes  
448 of the proposed *Caproiciproducens* spp. are often within a monophyletic clade, and are always  
449 close to each other (**Additional File 1: Figure S9**). The rBOX genes of *A. senegalensis* and *E.*  
450 *limosum* are phylogenetically closest to those of the *Caproiciproducens*. In the cases of *acdH*  
451 and *etf-β*, these bacteria form a cluster together with *Caproiciproducens* species. The  
452 exceptions are *thl* and *hbd* in *E. limosum*, which are distant to the *Caproiciproducens* and closer  
453 to the *Clostridium* species (**Additional File 1: Figure S9**). The lactate consumer  
454 *Ruminococcaceae* bacterium CPB6 shows an interesting pattern in the individual gene trees. In  
455 the gene trees of *thl* and *crt*, strain CPB6 clusters within the *Caproiciproducens* clade, but it is  
456 distant to these bacteria in the rest of the gene trees (**Additional File 1: Figure S9**). Because of  
457 this, in the consensus tree, strain CPB6 is relatively distant to strain 7D4C2 (**Figure 7B**). In  
458 summary, the distances of the rBOX genes varied among individual gene trees, both within well-  
459 known and not known chain-elongating bacteria, showing no consensus on a particular gene  
460 being relatively more conserved in chain-elongating bacteria than other bacteria.

461

## 462 **Conclusions**

463 We isolated a chain elongating bacterium (strain 7D4C2) that primarily produces *n*-caproate  
464 from carbohydrates at mildly acidic pH values (4.5-5.5). The isolate has the potential to be used

465 in chain-elongating bioreactors that treat organic waste and are operated at mildly acidic pH  
466 with in-line product extraction. After extensive comparison of the whole-genomes of strain  
467 7D4C2 with the isolates *C. galactitolivorans* and *C. fermentans*, and closely related unclassified  
468 bacteria (*Clostridium* sp. W14A, *Caproiciproducens* sp. NJN-50, and *Clostridium* sp. KNHs216),  
469 we would classify strain 7D4C2 and *C. fermentans* into the same genus of *Caproiciproducens*  
470 with *C. galactitolivorans*. The comparable phenotype and similar chain-elongation metabolism  
471 between strain 7D4C2, *C. fermentans*, and *C. galactitolivorans* also support that these bacteria  
472 belong to the same genus. Thus, we name our isolate *Caproiciproducens fermentans* 7D4C2,  
473 which is the same species as *Clostridium* sp. W14A and *C. fermentans*. The rBOX genes of  
474 these *Caproiciproducens* species are highly similar and relatively distant to the genes of other  
475 chain-elongating bacteria. The 6 rBOX genes in the *Caproiciproducens* spp. are located next to  
476 each other, forming a gene cluster. This rBOX cluster is also present in bacteria that do not  
477 chain elongate such as *A. senegalensis* and *Clostridium* spp.. The close similarity of the rBOX  
478 genes of strain 7D4C2 with these bacteria requires further investigation to understand what  
479 defines a chain elongator.

480

## 481 **Materials and Methods**

482

### 483 **Isolation of strain 7D4C2**

484 Rumen fluid (from a young sheep) and thermophilic anaerobic sludge, which was collected at  
485 the Western Lake Superior Sanitary District in 2011 (Duluth, MN, USA), were used to inoculate  
486 a bioreactor converting pretreated cellulosic hydrolysate into *n*-butyrate (Aglar et al., 2012b).  
487 Mixed liquor from this bioreactor was used to start a chain-elongation study with ethanol beer  
488 (Aglar et al., 2012a; Ge et al., 2015). After 5 years of chain elongation with ethanol beer, the  
489 mixed liquor was used to inoculate three chain-elongating bioreactors producing *n*-caproate and  
490 *n*-caprylate from ethanol and acetate (Spirito et al., unpublished data). We used a cryogenic

491 sample from one of these reactors to isolate bacteria *via* soft agar serial dilutions, as indicated  
492 in **Additional File 1: Figure S1**. For this, 10 mL of sterile and reduced supplemented basal  
493 medium (s-basal medium) (**Additional File 1: Table S5**), containing 0.6 % w/v Bacto Agar  
494 (Becton Dickinson, Sparks, MD, USA), were dispensed in 15-mL test tubes that were capped  
495 with butyl rubber stoppers and screw caps. After 1 – 2 weeks of incubation at 30°C and a pH of  
496  $5.2 \pm 0.1$ , we picked single colonies in an anaerobic glove box (MBraun, Garching, Germany).  
497 We cultured the selected colonies in 10 mL of supplemented basal medium with ethanol  
498 (Sigma-Aldrich, Steinheim, Germany) and/or fructose (Carl Roth, Karlsruhe, Germany) as  
499 substrates in 50-mL serum bottles. After 1 – 2 weeks of cultivation (when the serum bottles  
500 were turbid), we measured *n*-caproate and H<sub>2</sub> production and substrate consumption. The purity  
501 of cultures that produced *n*-caproate was examined through scanning electron and/or light  
502 microscopy and Sanger sequencing. The isolate that showed 100% purity is referred to as strain  
503 7D4C2.

504

#### 505 **Cultivation of strain 7D4C2**

506 We evaluated the chain-elongating metabolism of strain 7D4C2 with different electron  
507 acceptors, as well as its *n*-caproate and lactate production at different pH values and  
508 temperatures. For these, we grew strain 7D4C2 in 50-mL serum bottles with 10 mL of s-basal  
509 medium buffered with  $93.18 \pm 6.85$  mM MES (Carl Roth, Karlsruhe, Germany) (**Additional File**  
510 **1: Table S5**). For the electron-acceptor experiment (30°C, pH  $5.5 \pm 0.02$ ), we used  $24.4 \pm 1.7$   
511 mM fructose ( $146.4 \pm 10.3$  mmol C L<sup>-1</sup>) and the following carboxylates at a concentration of  
512  $108.2 \pm 8.0$  mmol C L<sup>-1</sup>: Na-acetate (VWR, Solon, OH, USA), Na-butyrate, propionic acid  
513 (Merck, Darmstadt, Germany), *n*-valeric acid (Merck, Darmstadt, Germany) and *n*-caproic acid  
514 (Carl Roth, Karlsruhe, Germany). This experiment was performed in triplicates. In the  
515 experiments at different pH values and temperatures, the primary substrates were  $24.7 \pm 0.5$   
516 mM fructose ( $148.2 \pm 3.2$  mmol C L<sup>-1</sup>) and  $18.7 \pm 1.0$  mM Na-butyrate ( $112.2 \pm 6.3$  mmol C L<sup>-1</sup>)

517 (ThermoFisher, Kandel, Germany). For the pH experiment, we grew strain 7D4C2 at 30°C in a  
518 pH range from 4.5 to 10. The initial pH value was adjusted with 2 N sodium hydroxide (Sigma  
519 Aldrich, Steinheim, Germany). For the temperature test, we grew strain 7D4C2 at various  
520 temperatures (*i.e.*, 22.5°C, 27°C, 30°C, 37°C, 42°C, 50°C) at the previously determined optimum  
521 pH value (*i.e.*, pH of 6.0). These experiments were performed in duplicates.

522

### 523 **Extraction of *n*-caproate with mineral oil and 3% (w/v) TOPO**

524 To assess whether the bacterium could produce more *n*-caproate without the inhibition of the  
525 undissociated acid, we continuously extracted the MCC using an extraction solvent. The  
526 extraction solvent consisted of 30 g/L of tri-*n*-octylphosphine oxide (TOPO, Acros Organics,  
527 Geel, Belgium) in mineral oil (Sigma Aldrich, Steinheim, Germany) (Kucek et al., 2016a). For  
528 this experiment, we grew strain 7D4C2 in 50-mL serum bottles containing 10 mL of s-basal  
529 medium ( $314.1 \pm 2.1$  mmol C L<sup>-1</sup> fructose,  $101.3 \pm 3.2$  mmol C L<sup>-1</sup> Na-butyrate, pH 5.2)  
530 (**Additional File 1: Table S5**). We added 10 mL of UV light-sterilized extraction solvent after  
531 three days of growth, when the *n*-caproate concentration was increasing, to prevent the initial  
532 loss of substrate (*i.e.*, *n*-butyrate) into the extractant. The solvent preferentially extracts  
533 hydrophobic molecules, resulting in extraction efficiencies of 83–93% for MCCs and 5–31% for  
534 SCCs (Agler et al., 2012b). Because *n*-caproate is more hydrophobic than *n*-butyrate when *n*-  
535 caproate is present, it is the main carboxylate extracted. The control serum bottles did not  
536 include an extraction solvent. Along with the addition of extractant, we added ~30 mM more  
537 fructose into all serum bottles to promote *n*-caproate production. We calculated the  
538 concentration of undissociated acid using the Henderson-Hasselback equation (Harroff et al.,  
539 2017). We took liquid samples (0.6 mL) from the culture and solvent phases. We washed the  
540 solvent samples five times with an equal amount of 0.3 M sodium borate (Acros Organics, Geel,  
541 Belgium) (pH = 9) to back-extract the carboxylic acids. The aqueous phase (*i.e.*, boric acid with  
542 the extracted carboxylates) of each wash was analyzed as indicated below. The concentrations

543 from each washing were summed to estimate the carboxylate production/consumption per data  
544 point. We tested these experiments in triplicates at 30°C.

545

#### 546 **Comparison among strain 7D4C2, *C. galactitolivorans*, and [*C.*] *leptum***

547 *C. galactitolivorans* BS-1 was acquired from the Japan Collection of Microorganisms RIKEN and  
548 [*C.*] *leptum* VPI T7-24-1 from the German Collection of Microorganisms and Cell Cultures  
549 (DSMZ). The sugar consumption of strain 7D4C2, *C. galactitolivorans*, and *C. leptum* was  
550 compared in 50-mL serum bottles incubated at 37°C and a pH of 7.0. Since *C. leptum* did not  
551 grow in the supplemented basal medium in which we grew strain 7D4C2 (**Additional File 1:**  
552 **Table S5**), nor in the optimized medium for *C. galactitolivorans* (Jeon et al., 2013), the three  
553 bacteria were grown in 10 mL of DSMZ medium 107c with glucose as the primary substrate. We  
554 tested these experiments in triplicates.

555

#### 556 **Analysis of sugars, carboxylates, and H<sub>2</sub>**

557 We quantified sugars and carboxylates (the total of the dissociated and undissociated forms)  
558 throughout the culturing period *via* high-performance liquid chromatography (HPLC), as  
559 described in (Klask et al., 2020). For the sample preparation, 0.6 mL culture were centrifuged at  
560 13,350 rpm for 6 min in a Benchtop centrifuge (5424 Eppendorf, Hamburg, Germany). The  
561 supernatant was filtered through a 0.22- $\mu$ m polyvinylidene fluoride syringe filter (Carl Roth,  
562 Karlsruhe, Germany) and stored alongside the biomass pellets at -20°C until analyzed. Only the  
563 acetate, *n*-butyrate, and *n*-caproate concentrations from the pH experiment were analyzed with  
564 an Agilent 7890B Gas Chromatograph (Agilent Technologies, Inc., Santa Clara, CA, USA),  
565 equipped with a capillary column (DB-Fatwax UI 30 m x 0.25 m; Agilent Technologies) and an  
566 FID detector with a ramp temperature program (initial temperature of 80°C for 0.5 min, then  
567 20°C per min up to 180°C, and final temperature of 180°C for 1 min). The injection and detector  
568 temperatures were 250°C and 275°C, respectively. Samples were prepared as for HPLC with

569 the addition of an internal standard (Ethyl-butyric acid) and acidification (to pH 2) with 50%  
570 formic acid.

571  
572 To assess H<sub>2</sub> production, we collected 250- $\mu$ L gas samples with a 500- $\mu$ L syringe  
573 (Hamilton, Giarmata, Romania). We injected 200  $\mu$ L in a gas chromatograph (SRI 570 8610C,  
574 SRI Instruments, Las Vegas, NV, USA) with the characteristics described in (Ruaud et al.,  
575 2020). We used the ideal gas equation to calculate the moles of H<sub>2</sub> produced per culture  
576 volume. For this, we measured the gas pressure in the serum bottles with a digital pressure  
577 gauge (Cole Parmer, Vernon Hills, IL, USA). We measured the cell density (OD<sub>600</sub>) with a  
578 NanoPhotometer NP80 at 600 nm with a path length of 0.67 mm (Implen, Westlake Village, CA,  
579 USA).

580

### 581 **Microscopy and morphology characterization**

582 To image the isolate *via* light microscopy, we centrifuged a 0.5-mL sample of culture in the  
583 exponential phase at 7000 rpm for 5 min in a Benchtop centrifuge (5424 Eppendorf, Hamburg,  
584 Germany). We washed the pelleted biomass 1 – 2 times and resuspended it with 50  $\mu$ L 1x PBS  
585 from which we fixed 2  $\mu$ L on solidified agarose (VWR, Solon, OH, USA) (1% w/v). To image the  
586 isolate *via* Scanning Electron Microscopy (SEM), we pelleted 6 mL of culture for 3 min at 7000  
587 rpm (Benchtop centrifuge 5424 Eppendorf, Hamburg, Germany) inside a glove-box (MBraun,  
588 Garching, Germany). We washed the pellet five times with 500  $\mu$ L of 1x PBS. After the last  
589 washing step, we resuspended the pellet with 450  $\mu$ L of 1x PBS and added 50  $\mu$ L of 25% (v/v)  
590 glutaraldehyde for fixation. Samples were incubated at room temperature for 2 h, and then  
591 handed over to the SEM center at the Max-Planck Institute for Developmental Biology  
592 (Tübingen, Germany) for further processing and imaging, as detailed in Ruaud et al. (2020). For  
593 Gram staining, we used the Gram stain for films kit (Sigma-Aldrich, Steinheim, Germany), as  
594 described in the manufacturer's protocol.

595

## 596 **DNA extraction and 16S rRNA gene sequence phylogenetic analysis**

597 We extracted DNA from the biomass pellets stored at  $-20^{\circ}\text{C}$  using a NucleoSpin® Microbial  
598 DNA Kit (Macherey-Nagel, Düren, Deutschland), according to the manufacturer's protocol. The  
599 16S rRNA gene was amplified from genomic DNA using the universal primers sets 27F/1391R  
600 and 27F/1525R. The PCR product was purified with DNA Clean Concentrator-5 (Zymo  
601 Research, Irvine, CA, USA). Universal primers 27F, 342F, 515F, 926F, and 926R and the  
602 designed primer 1492-capro-R (CTACCTTGTTACGACTTCACC) were used to sequence the  
603 whole 16S rRNA gene *via* Sanger sequencing. We designed primer 1492-capro-R using the  
604 16S rRNA gene sequence of *C. galactitolivorans* (NCBI [FJ805840](https://.ncbi.nlm.nih.gov/nucl/FJ805840)) as reference. PCR products  
605 were sent for sequencing to the Genome Center at the MPI for Developmental Biology  
606 (Tübingen, Germany). We used Geneious Prime® 2019.1.3 (<http://www.geneious.com>) to trim  
607 and align the DNA sequences, using the global Geneious alignment tool at a 93% similarity with  
608 gap open and gap extension penalties of 8 and 2, respectively, and 15 refinement iterations. We  
609 compared the assembled 16S rRNA gene sequence to the four sequences extracted from the  
610 genome using the Basic Local Alignment Search Tool (BLAST) from the National Center for  
611 Biotechnology Information (NCBI) (<https://blast.ncbi.nlm.nih.gov/Blast.cgi>). We used the most  
612 similar sequence (1517 bp) to the Sanger assembly (99.46%) to construct a phylogenetic tree of  
613 strain 7D4C2 and its closest relatives. For this, we aligned the 16S rRNA gene sequence to  
614 sequences in the Standard nucleotide collection (nr/nt) database using the NCBI BLAST. We  
615 constructed the phylogenetic tree using the Single-Genes-Tree tool (<http://ggdc.dsmz.de/>).  
616 Pairwise sequence similarities between the 16S rRNA gene and closest relatives were  
617 calculated using the method recommended by (Meier-Kolthoff et al., 2013b) for the 16S rRNA  
618 gene sequence available *via* the Genome to Genome Distance Calculator (GGDC) web server  
619 (Meier-Kolthoff et al., 2013a) accessible at <http://ggdc.dsmz.de/>. Phylogenies were inferred by  
620 the GGDC web server (Meier-Kolthoff et al., 2013a), using the DSMZ phylogenomics pipeline



621 (Meier-Kolthoff et al., 2014), which was adapted to single genes. A multiple-sequence alignment  
622 was created with MUSCLE (Edgar 2004). Maximum likelihood (ML) and maximum parsimony  
623 (MP) trees were inferred from the alignment with RAxML (Stamatakis, 2014) and TNT (Goloboff  
624 et al., 2008), respectively. For ML, rapid bootstrapping in conjunction with the autoMRE  
625 bootstrapping criterion (Pattengale et al., 2010) and subsequent search for the best tree was  
626 used. For MP, 1000 bootstrapping replicates were used in conjunction with tree-bisection-and-  
627 reconnection branch swapping and ten random sequence addition replicates. The sequences  
628 were checked for a compositional bias using the  $X^2$  test as implemented in PAUP\* (Swofford,  
629 2002).

630

### 631 **Genome sequencing, assembly, alignment, and annotations**

632 The DNA was extracted using a NucleoSpin® Microbial DNA Kit (Macherey-Nagel, Düren,  
633 Deutschland), according to the manufacturer's protocol. The DNA library was prepared using a  
634 Rapid barcoding kit (SQK-RBK004, Oxford Nanopore Technologies Ltd., Oxford Science Park,  
635 UK). The DNA was sequenced using a MinION sequencer (Oxford Nanopore Technologies Ltd.,  
636 Oxford Science Park, UK) with a single R9.4.1 flow cell. The basecalling was performed with  
637 guppy (v 3.6.0) in high accuracy mode. The basecalled reads were assembled using Unicycler  
638 (Wick et al., 2017) (v 0.4.8) with three rounds of Racon (Vaser et al., 2017) (v 1.4.10) polishing,  
639 and one round of medaka (v 1.0.1 - <https://github.com/nanoporetech/medaka>) correction in  
640 r941\_min\_high\_g360 mode. The corrected assembly resulted in a single, circular, closed  
641 chromosome. The quality of the assembly (contamination and completeness) was assessed  
642 using CheckM in lineage\_wf mode (Parks et al., 2015). We annotated the assembled  
643 chromosome using PGAP (Tatusova et al., 2016) (v 2020-03-30.build4489). We obtained 3914  
644 genes in total. The products of the 722 of the 3633 (19.9%) CDS were annotated as  
645 "hypothetical protein". We aligned the predicted CDSs against EggNOG 5.0 (Huerta-Cepas et

646 al., 2019) database, using eggno-mapper (Huerta-Cepas et al., 2017) (v 2.0.1) with DIAMOND  
647 as the choice of the aligner, and assigned a COG annotation to 3338 of them (91.8%).

648

### 649 **Taxonomic placement**

650 To assign taxonomy, we extracted the identified 16S rRNA gene sequences and aligned them  
651 against the National Center for Biotechnology Information nucleotide database (NCBI-nt). We  
652 aligned the whole chromosome against NCBI-nt using minimap2 (Li, 2018) (in asm20 mode)  
653 and against NCBI-nr (protein database) using DIAMOND (Buchfink et al., 2015) (with the --long-  
654 reads parameter), and assigned taxonomy to it using MEGAN-LR (Huson et al., 2018) (with  
655 parameters --lcaCoveragePercent 51 and --longReads). We also used GTDB-Tk (Chaumeil et  
656 al., 2020) to classify the genome using the Genome Taxonomy Database (Parks et al., 2018).  
657 All methods agreed on assigning strain 7D4C2 to the unclassified organism *Clostridium* sp.  
658 W14A. To further explore the taxonomy of strain 7D4C2, we calculated its average nucleotide  
659 identity (ANI) using JSpeciesWS (Richter et al., 2016) to all genomes available for the  
660 Clostridiales class in GenBank (8662 genomes, accessed on 07/11/2019). We chose the 13  
661 most similar classified microbes for further analysis and used *C. kluyveri* as an outgroup. Next,  
662 we compared the percentage of conserved proteins (POCP) as proposed in (Qin et al., 2014),  
663 and the genome relatedness index as proposed in (Barco et al., 2020).

664

### 665 **Phylogenetic analysis and synteny of the genes in the rBOX cluster**

666 We aligned the genes from strain 7D4C2 that are known to be responsible for chain elongation  
667 (*i.e.*, *thl*, *hbd*, *crt*, *acdH*, and *etf- $\alpha$*  and *- $\beta$* ) against the protein sets of closely related microbes,  
668 using DIAMOND (Buchfink et al., 2015) (more-sensitive setting) in BLASTP mode. We obtained  
669 the homologs of these proteins in the genomes of bacteria closely related to strain 7D4C2 by  
670 filtering DIAMOND hits that cover more than 90% of the query and have more than 45% of  
671 positives in the alignment. Because some bacteria had several genes coding for rBOX proteins,

672 for our phylogenetic analyses we focused on the genes that formed a cluster or on those most  
673 similar to the genes considered from other bacteria. We computed multiple sequence  
674 alignments of the rBOX homologs using MUSCLE (Edgar, 2004) and phylogenetic trees using  
675 RAxML (Stamatakis, 2014) with 1000 rounds of bootstrapping (PROTGAMMAAUTO model,  
676 parsimony seed set to 12345). We also generated a consensus tree using SplitsTree 5 (v  
677 5.0.0\_alpha, with Consensus=Greedy option) (Huson, 1998) of all of the 17 taxa and 6 gene  
678 trees. We traced back the genomic coordinates of the rBOX homologs from their annotations on  
679 NCBI RefSeq, and used this information to check for synteny and their organization in the  
680 genomes manually.

681

## 682 **Additional Files**

683

### 684 Additional File 1

685 Figure S1: Summary of the isolation process of strain 7D4C2.

686 Figure S2: Gram staining of strain 7D4C2 and controls for negative and positive staining.

687 Figures S3: OD<sub>600</sub> and H<sub>2</sub> production throughout the culturing period for strain 7D4C2 at  
688 different pH values and temperatures.

689 Figures S4: Fructose, *n*-butyrate, and products concentrations throughout the culturing period  
690 for strain 7D4C2 at different pH values and temperatures.

691 Figure S5: OD<sub>600</sub> and H<sub>2</sub> production throughout the culturing period for strain 7D4C2 with and  
692 without extraction solvent.

693 Figure S6: Phylogeny between strain 7D4C2 and its closest relatives based on the 16S rRNA  
694 gene sequence.

695 Figure S7: Comparison of glucose fermentation by strain 7D4C2, *C. galactitolivorans* and *C.*  
696 *leptum*.

697 Figure S8: Substrate consumption by strain 7D4C2 according to the AN MicroPlate™ from  
698 Biolog (Hayward, CA.)  
699 Figure S9: Phylogenetic trees of the rBOX genes in strain 7D4C2, closest relatives, and known  
700 chain-elongating bacteria.  
701 Table S1: Maximum OD<sub>600</sub>, final electron donor and acceptor and product concentrations, and  
702 *n*-caproate specificity in cultures of strain 7D4C2 with different electron acceptors.  
703 Table S2: Maximum OD<sub>600</sub> values, final concentration of products, and specificities of lactate  
704 and *n*-caproate in cultures of strain 7D4C2 grown at different pH values and temperatures.  
705 Table S3. Average nucleotide identity (ANI) and alignment fraction (AF) values between strain  
706 7D4C2 and most similar strains.  
707 Table S4: Comparison of carbohydrates oxidized by strain 7D4C2, *C. galactitolivorans*, and *C.*  
708 *fermentans*.  
709 Table S5: Composition of the supplemented basal medium.

710

#### 711 Additional File 2

712 Location and percent identity of all rBOX genes in strain 7D4C2, closely related bacteria,  
713 bacteria with similar rBOX genes, and known chain-elongating bacteria. In green: rBOX genes  
714 used in the phylogenetic analyses.

715

#### 716 **List of abbreviations**

717 MCC: medium-chain carboxylate (comprising both the dissociated and undissociated forms);  
718 SCC: short-chain carboxylate (comprising both the dissociated and undissociated forms); rBOX:  
719 reverse  $\beta$ -oxidation; Thl: thiolase; HBD: 3-hydroxybutyryl-CoA dehydrogenase; Crt: crotonyl-  
720 CoA; ACDH: acyl-CoA dehydrogenase; ETF: electron transport flavoprotein; ANI: average  
721 nucleotide identity; POCP: percentage of conserved proteins; AF: aligned fraction; OD<sub>600</sub>: optical  
722 density measured at 600 nm.

723

#### 724 **Availability of data and materials**

725 Strain 7D4C2 was deposited in the German Collection of Microorganisms and Cell Cultures  
726 (DSMZ) under the accession number DSM 110548. The datasets generated and analyzed  
727 during the present study are included in this published article and are available from LA and  
728 SEE on request. The assembled 16S rRNA sequences and the whole-genome of the isolate are  
729 available online (<https://www.ncbi.nlm.nih.gov>) under the accession numbers NCBI [MT056029](#)  
730 and Project ID PRJNA615378, respectively. Raw sequencing MinION data are available online  
731 (<https://www.ncbi.nlm.nih.gov>) under the project ID.

732

#### 733 **Competing interests**

734 The authors declare that they have no competing interests.

735

#### 736 **Funding**

737 This work was funded through the Alexander von Humboldt Foundation in the framework of the  
738 Alexander von Humboldt Professorship, which was awarded to LTA. We are also thankful for  
739 additional funding to LTA from the Deutsche Forschungsgemeinschaft (DFG, German Research  
740 Foundation) under Germany's Excellence Strategy – EXC 2124 – 390838134. We also  
741 acknowledge support by the DFG and Open Access Publishing Fund of the University of  
742 Tübingen. Finally, this work was supported by the Max Planck Society to LTA as part of being a  
743 Max Planck Fellow, and by the German Research Foundation (DFG) through grant no. HU  
744 566/12-1 awarded to DHH. The authors acknowledge support by the High Performance and  
745 Cloud Computing Group at the Zentrum für Datenverarbeitung of the University of Tübingen, the  
746 state of Baden-Württemberg through bwHPC and the German Research Foundation (DFG)  
747 through grant no. INST 37/935-1 FUGG.

748

749 **Authors contributions**

750 LTA conceived the project, and SEE designed and guided the study. MT and SEE performed  
751 the lab experiments. CB performed the bioinformatics analyses. MT, CB, and SEE analyzed the  
752 data. MT, CB, and SEE prepared the figures and tables. SEE, LTA, CB, and MT drafted the  
753 manuscript. BYJ and IB performed the genome sequencing, and RBHW advised on the  
754 sequencing tools. LTA and DHH provided guidance. All authors edited the manuscript and  
755 approved the final manuscript.

756

757 **Acknowledgments**

758 Authors are thankful to Ursula Schach for the valuable help acquiring *C. galactitolivorans* and  
759 dealing with the deposit agreements with the DSMZ and ATCC collection banks.

760

761 **References**

- 762 Agler, M.T., Spirito, C.M., Usack, J.G., Werner, J.J., Angenent, L.T. 2012a. Chain elongation  
763 with reactor microbiomes: upgrading dilute ethanol to medium-chain carboxylates.  
764 *Energy Environ. Sci.*, **5**(8), 8189.
- 765 Agler, M.T., Spirito, C.M., Usack, J.G., Werner, J.J., Angenent, L.T. 2014. Development of a  
766 highly specific and productive process for n-caproic acid production: applying lessons  
767 from methanogenic microbiomes. *Water Sci. Technol.*, **69**(1), 62-68.
- 768 Agler, M.T., Werner, J.J., Iten, L.B., Dekker, A., Cotta, M.A., Dien, B.S., Angenent, L.T. 2012b.  
769 Shaping reactor microbiomes to produce the fuel precursor n-butyrate from pretreated  
770 cellulosic hydrolysates. *Environ. Sci. Technol.*, **46**(18), 10229-10238.
- 771 Angenent, L.T., Richter, H., Buckel, W., Spirito, C.M., Steinbusch, K.J.J., Plugge, C.M., Strik,  
772 D.P.B.T.B., Grootscholten, T.I.M., Buisman, C.J.N., Hamelers, H.V.M. 2016. Chain  
773 elongation with reactor microbiomes: Open-culture biotechnology to produce  
774 biochemicals. *Environ. Sci. Technol.*, **50**(6), 2796-2810.
- 775 Barco, R., Garrity, G., Scott, J., Amend, J., Nealson, K., Emerson, D. 2020. A genus definition  
776 for bacteria and archaea based on a standard genome relatedness index. *mBio*, **11**(1).
- 777 Buchfink, B., Xie, C., Huson, D.H. 2015. Fast and sensitive protein alignment using DIAMOND.  
778 *Nat. methods*, **12**(1), 59.
- 779 Chaumeil, P.-A., Mussig, A.J., Hugenholtz, P., Parks, D.H. 2020. GTDB-Tk: a toolkit to classify  
780 genomes with the Genome Taxonomy Database, Oxford University Press.
- 781 Contreras-Dávila, C.A., Carrión, V.J., Vonk, V.R., Buisman, C.N.J., Strik, D.P.B.T.B. 2020.  
782 Consecutive lactate formation and chain elongation to reduce exogenous chemicals  
783 input in repeated-batch food waste fermentation. *Water Res.*, **169**, 115215.
- 784 Desbois, A.P. 2012. Potential applications of antimicrobial fatty acids in medicine, agriculture  
785 and other industries. *Recent Pat. Antiinfect. Drug Discov.*, **7**(2), 111-122.

- 786 Duber, A., Jaroszynski, L., Zagrodnik, R., Chwialkowska, J., Juzwa, W., Ciesielski, S.,  
787 Oleskiewicz-Popiel, P. 2018. Exploiting the real wastewater potential for resource  
788 recovery – *n*-caproate production from acid whey. *Green Chem.*, **20**(16), 3790-3803.
- 789 Edgar, R.C. 2004. MUSCLE: multiple sequence alignment with high accuracy and high  
790 throughput. *Nucleic Acids Res.*, **32**(5), 1792-1797.
- 791 Felicity A. Roddick, Britx, M.L. 1997. Production of hexanoic acid by free and immobilised cells  
792 of *Megasphaera elsdenii*: Influence of *in-situ* product removal using ion exchange resin.  
793 *J. Chem. Tech. Biotechnol.*, **69**, 383-391.
- 794 Flaiz, M., Baur, T., Brahner, S., Poehlein, A., Daniel, R., Bengelsdorf, F.R. 2020. *Caproicibacter*  
795 *fermentans* gen. nov., sp. nov., a new caproate-producing bacterium and emended  
796 description of the genus *Caproiciproducens*. *Int. J. Syst. Evol. Microbiol.*
- 797 Ge, S., Usack, J.G., Spirito, C.M., Angenent, L.T. 2015. Long-term *n*-caproic acid production  
798 from yeast-fermentation beer in an anaerobic bioreactor with continuous product  
799 extraction. *Environ. Sci. Technol.*, **49**(13), 8012-8021.
- 800 Goloboff, P.A., Farris, J.S., Nixon, K.C. 2008. TNT, a free program for phylogenetic analysis.  
801 *Cladistics*, **24**(5), 774-786.
- 802 Harroff, L.A., Liotta, J.L., Bowman, D.D., Angenent, L.T. 2017. Inactivation of ascaris eggs in  
803 human fecal material through *in situ* production of carboxylic acids. *Environ. Sci.*  
804 *Technol.*, **51**(17), 9729-9738.
- 805 Harvey, B.G., Meylemans, H.A. 2014. 1-Hexene: a renewable C6 platform for full-performance  
806 jet and diesel fuels. *Green Chem.*, **16**(2), 770-776.
- 807 Huerta-Cepas, J., Forslund, K., Coelho, L.P., Szklarczyk, D., Jensen, L.J., Von Mering, C., Bork,  
808 P. 2017. Fast genome-wide functional annotation through orthology assignment by  
809 eggNOG-mapper. *Mol. Biol. Evol.*, **34**(8), 2115-2122.
- 810 Huerta-Cepas, J., Szklarczyk, D., Heller, D., Hernández-Plaza, A., Forslund, S.K., Cook, H.,  
811 Mende, D.R., Letunic, I., Rattei, T., Jensen, L.J. 2019. eggNOG 5.0: a hierarchical,  
812 functionally and phylogenetically annotated orthology resource based on 5090  
813 organisms and 2502 viruses. *Nucleic Acids Res.*, **47**(D1), D309-D314.
- 814 Huson, D.H. 1998. SplitsTree: analyzing and visualizing evolutionary data. *Bioinformatics*  
815 (*Oxford, England*), **14**(1), 68-73.
- 816 Huson, D.H., Albrecht, B., Bağcı, C., Bessarab, I., Gorska, A., Jolic, D., Williams, R.B. 2018.  
817 MEGAN-LR: new algorithms allow accurate binning and easy interactive exploration of  
818 metagenomic long reads and contigs. *Biol. Direct*, **13**(1), 6.
- 819 Jeon, B.S., Choi, O., Um, Y., Sang, B.-I. 2016. Production of medium-chain carboxylic acids by  
820 *Megasphaera* sp. MH with supplemental electron acceptors. *Biotechnol. Biofuels*, **9**, 129.
- 821 Jeon, B.S., Kim, B.-C., Um, Y., Sang, B.-I. 2010. Production of hexanoic acid from D-galactitol  
822 by a newly isolated *Clostridium* sp. BS-1. *Appl. Microbiol. Biotechnol.*, **88**(5), 1161-1167.
- 823 Jeon, B.S., Moon, C., Kim, B.-C., Kim, H., Um, Y., Sang, B.-I. 2013. *In situ* extractive  
824 fermentation for the production of hexanoic acid from galactitol by *Clostridium* sp. BS-1.  
825 *Enzyme Microb. Tech.*, **53**(3), 143-151.
- 826 Kenealy, W.R., Cao, Y., Weimer, P.J. 1995. Production of caproic acid by cocultures of ruminal  
827 cellulolytic bacteria and *Clostridium kluyveri* grown on cellulose and ethanol. *Appl.*  
828 *Microbiol. Biotechnol.*, **44**(3), 507-513.
- 829 Kim, B.-C., Seung Jeon, B., Kim, S., Kim, H., Um, Y., Sang, B.-I. 2015. *Caproiciproducens*  
830 *galactitolivorans* gen. nov., sp. nov., a bacterium capable of producing caproic acid from  
831 galactitol, isolated from a wastewater treatment plant. *Int. J. Syst. Evol. Microbiol.*,  
832 **65**(12), 4902-4908.
- 833 Klask, C.-M., Kliem-Kuster, N., Molitor, B., Angenent, L.T. 2020. Nitrate feed improves growth  
834 and ethanol production of *Clostridium ljungdahlii* with CO<sub>2</sub> and H<sub>2</sub>, but results in  
835 stochastic inhibition events. *Front. Microbiol.*, **11**, 724.

- 836 Kucek, L.A., Nguyen, M., Angenent, L.T. 2016a. Conversion of L-lactate into *n*-caproate by a  
837 continuously fed reactor microbiome. *Water Res.*, **93**, 163-171.
- 838 Kucek, L.A., Spirito, C.M., Angenent, L.T. 2016b. High *n*-caprylate productivities and  
839 specificities from dilute ethanol and acetate: chain elongation with microbiomes to  
840 upgrade products from syngas fermentation. *Energy Environ. Sci.*, **9**(11), 3482-3494.
- 841 Lanjekar, V.B., Marathe, N.P., Ramana, V.V., Shouche, Y.S., Ranade, D.R. 2014. *Megasphaera*  
842 *indica* sp. nov., an obligate anaerobic bacteria isolated from human faeces. *Int. J. Syst.*  
843 *Evol. Microbiol.*, **64**(Pt 7), 2250-2256.
- 844 Levy, P.F., Sanderson, J.E., Kispert, R.G., Wise, D.L. 1981. Biorefining of biomass to liquid  
845 fuels and organic chemicals. *Enzyme Microb. Techn.*, **3**(3), 207-215.
- 846 Li, H. 2018. Minimap2: pairwise alignment for nucleotide sequences. *Bioinformatics*, **34**(18),  
847 3094-3100.
- 848 Lindley, N., Loubiere, P., Pacaud, S., Mariotto, C., Goma, G. 1987. Novel products of the  
849 acidogenic fermentation of methanol during growth of *Eubacterium limosum* in the  
850 presence of high concentrations of organic acids. *Microbiol.*, **133**(12), 3557-3563.
- 851 Lino, T., Mori, K., Tanaka, K., Suzuki, K.-i., Harayama, S. 2007. *Oscillibacter valericigenes* gen.  
852 nov., sp. nov., a valerate-producing anaerobic bacterium isolated from the alimentary  
853 canal of a Japanese corbicula clam. *Int. J. Syst. Evol. Microbiol.*, **57**(8), 1840-1845.
- 854 Marounek, M., Fliegrova, K., Bartos, S. 1989. Metabolism and some characteristics of ruminal  
855 strains of *Megasphaera elsdenii*. *Appl. Environ. Microbiol.*, **55**(6), 1570-1573.
- 856 Meier-Kolthoff, J.P., Auch, A.F., Klenk, H.-P., Göker, M. 2013a. Genome sequence-based  
857 species delimitation with confidence intervals and improved distance functions. *BMC*  
858 *Bioinformatics*, **14**, 60.
- 859 Meier-Kolthoff, J.P., Göker, M., Spröer, C., Klenk, H.-P. 2013b. When should a DDH experiment  
860 be mandatory in microbial taxonomy? *Arch. Microbiol.*, **195**(6), 413-418.
- 861 Meier-Kolthoff, J.P., Hahnke, R.L., Petersen, J., Scheuner, C., Michael, V., Fiebig, A., Rohde,  
862 C., Rohde, M., Fartmann, B., Goodwin, L.A., Chertkov, O., Reddy, T.B.K., Pati, A.,  
863 Ivanova, N.N., Markowitz, V., Kyrpides, N.C., Woyke, T., Göker, M., Klenk, H.-P. 2014.  
864 Complete genome sequence of DSM 30083T, the type strain (U5/41T) of *Escherichia*  
865 *coli*, and a proposal for delineating subspecies in microbial taxonomy. *Stand. Genomic*  
866 *Sci.*, **9**(1), 2.
- 867 Park, S., Yasin, M., Jeong, J., Cha, M., Kang, H., Jang, N., Choi, I.-G., Chang, I.S. 2017.  
868 Acetate-assisted increase of butyrate production by *Eubacterium limosum* KIST612  
869 during carbon monoxide fermentation. *Biores. Technol.*, **245**, 560-566.
- 870 Parks, D.H., Chuvochina, M., Waite, D.W., Rinke, C., Skarshewski, A., Chaumeil, P.-A.,  
871 Hugenholtz, P. 2018. A standardized bacterial taxonomy based on genome phylogeny  
872 substantially revises the tree of life. *Nat. Biotechnol.*, **36**(10), 996-1004.
- 873 Parks, D.H., Imelfort, M., Skennerton, C.T., Hugenholtz, P., Tyson, G.W. 2015. CheckM:  
874 assessing the quality of microbial genomes recovered from isolates, single cells, and  
875 metagenomes. *Genome Res.*, **25**(7), 1043-1055.
- 876 Pattengale, N.D., Alipour, M., Bininda-Emonds, O.R.P., Moret, B.M.E., Stamatakis, A. 2010.  
877 How many bootstrap replicates are necessary? *J. Comp. Biol.*, **17**(3), 337-354.
- 878 Qin, Q.-L., Xie, B.-B., Zhang, X.-Y., Chen, X.-L., Zhou, B.-C., Zhou, J., Oren, A., Zhang, Y.-Z.  
879 2014. A proposed genus boundary for the prokaryotes based on genomic insights. *J.*  
880 *Bacteriol.*, **196**(12), 2210-2215.
- 881 Richter, M., Rosselló-Móra, R. 2009. Shifting the genomic gold standard for the prokaryotic  
882 species definition. *Proc. Natl. Acad. Sci. U. S. A.*, **106**(45), 19126-19131.
- 883 Richter, M., Rosselló-Móra, R., Oliver Glöckner, F., Peplies, J. 2016. JSpeciesWS: a web server  
884 for prokaryotic species circumscription based on pairwise genome comparison.  
885 *Bioinformatics*, **32**(6), 929-931.



- 886 Roh, H., Ko, H.-J., Kim, D., Choi, D.G., Park, S., Kim, S., Chang, I.S., Choi, I.-G. 2011.  
887 Complete genome sequence of a carbon monoxide-utilizing acetogen, *Eubacterium*  
888 *limosum* KIST612. *J. Bacteriol.*, **193**(1), 307-308.
- 889 Ruaud, A., Esquivel-Elizondo, S., de la Cuesta-Zuluaga, J., Waters, J.L., Angenent, L.T.,  
890 Youngblut, N.D., Ley, R.E. 2020. Syntrophy *via* interspecies H<sub>2</sub> transfer between  
891 *Christensenella* and *Methanobrevibacter* underlies their global cooccurrence in the  
892 human gut. *mBio*, **11**(1).
- 893 Russell, J. 1992. Another explanation for the toxicity of fermentation acids at low pH: anion  
894 accumulation versus uncoupling. *J. Appl. Bacteriol.*, **73**(5), 363-370.
- 895 Spirito, C.M., Marzilli, A.M., Angenent, L.T. 2018. Higher substrate ratios of ethanol to acetate  
896 steered chain elongation towards *n*-caprylate in a bioreactor with product extraction.  
897 *Environ. Sci. Technol.*, **52**(22), 13438-13447.
- 898 Spirito, C.M., Richter, H., Rabaey, K., Stams, A.J.M., Angenent, L.T. 2014. Chain elongation in  
899 anaerobic reactor microbiomes to recover resources from waste. *Curr. Opin. Biotechnol.*,  
900 **27**, 115-122.
- 901 Stamatakis, A. 2014. RAxML version 8: a tool for phylogenetic analysis and post-analysis of  
902 large phylogenies. *Bioinformatics*, **30**(9), 1312-1313.
- 903 Swofford, D.L. 2002. PAUP\*: Phylogenetic analysis using parsimony (\*and other methods). 4.0.  
904 B5.
- 905 Tatusova, T., DiCuccio, M., Badretdin, A., Chetvernin, V., Nawrocki, E.P., Zaslavsky, L.,  
906 Lomsadze, A., Pruitt, K.D., Borodovsky, M., Ostell, J. 2016. NCBI prokaryotic genome  
907 annotation pipeline. *Nucleic Acids Res.*, **44**(14), 6614-6624.
- 908 Vaser, R., Sović, I., Nagarajan, N., Šikić, M. 2017. Fast and accurate de novo genome  
909 assembly from long uncorrected reads. *Genome Res.*, **27**(5), 737-746.
- 910 Wang, H., Li, X., Wang, Y., Tao, Y., Lu, S., Zhu, X., Li, D. 2018. Improvement of *n*-caproic acid  
911 production with *Ruminococcaceae* bacterium CPB6: selection of electron acceptors and  
912 carbon sources and optimization of the culture medium. *Microb. Cell Fact.*, **17**(1), 99.
- 913 Wick, R.R., Judd, L.M., Gorrie, C.L., Holt, K.E. 2017. Unicycler: resolving bacterial genome  
914 assemblies from short and long sequencing reads. *PLoS Comput. Biol.*, **13**(6),  
915 e1005595.
- 916 Xu, J., Guzman, J.J.L., Andersen, S.J., Rabaey, K., Angenent, L.T. 2015. In-line and selective  
917 phase separation of medium-chain carboxylic acids using membrane electrolysis. *Chem.*  
918 *Commun.*, **51**(31), 6847-6850.
- 919 Xu, J., Hao, J., Guzman, J.J.L., Spirito, C.M., Harroff, L.A., Angenent, L.T. 2018. Temperature-  
920 phased conversion of acid whey waste into medium-chain carboxylic acids *via* lactic  
921 acid: no external e-donor. *Joule*, **2**(2), 280-295.
- 922 Yarza, P., Yilmaz, P., Pruesse, E., Glöckner, F.O., Ludwig, W., Schleifer, K.-H., Whitman, W.B.,  
923 Euzéby, J., Amann, R., Rosselló-Móra, R. 2014. Uniting the classification of cultured and  
924 uncultured bacteria and archaea using 16S rRNA gene sequences. *Nat. Rev. Microbiol.*,  
925 **12**(9), 635-645.
- 926 Zhu, X., Zhou, Y., Wang, Y., Wu, T., Li, X., Li, D., Tao, Y. 2017. Production of high-  
927 concentration *n*-caproic acid from lactate through fermentation using a newly isolated  
928 *Ruminococcaceae* bacterium CPB6. *Biotechnol. Biofuels*, **10**(1).

930

931

932

933 **Figure legends**

934

935 **Figure 1** Pathways and genes involved in the conversion of hexoses into lactate and the  
936 conversion of these substrates into *n*-caproate *via* the reverse  $\beta$ -oxidation (rBOX) pathway. The  
937 first cycle of the rBOX pathway involves the conversion of the acetate produced by one acetyl-  
938 CoA molecule into *n*-butyrate. The second cycle involves the conversion of this *n*-butyrate into  
939 *n*-caproate *via* the butyryl-CoA produced in the first cycle and an acetyl-CoA molecule. The  
940 genes that code for the enzymes catalyzing the production of lactate and its conversion into  
941 pyruvate and each reaction of the rBOX pathway are shown for each reaction. rBOX genes: *thl*,  
942 thiolase (acetyl-CoA C-acetyltransferase); *hbd*, 3-hydroxybutyryl-CoA dehydrogenase; *crt*,  
943 crotonase (3-hydroxybutyryl-CoA dehydratase); *acdH*, Acyl-CoA dehydrogenase; *etf*, Electron  
944 transport flavoprotein; *act*, acetate-CoA transferase. Lactate production gene: *ldh*, *L-ldh*, L-  
945 lactate dehydrogenase. Lactate consumption genes: *larA*, lactate racemase; *D-ldh*: D-lactate  
946 dehydrogenase.

947

948 **Figure 2** Growth of strain 7D4C2 with fructose at pH 5.5 and 30°C: A-B) scanning electron  
949 micrographs of strain 7D4C2; C) fructose conversion into *n*-caproate and lactate; D) growth  
950 measured by OD<sub>600</sub>; and C) H<sub>2</sub> production. Error bars represent one standard deviation among  
951 triplicate cultures.

952

953 **Figure 3** Comparison of lactate and MCCs (*i.e.*, *n*-valerate and *n*-caproate) produced by strain  
954 7D4C2 from fructose and different electron acceptors (C2→ C6): **A)** comparison of final  
955 products and fructose and electron donor consumption among experiments; and **B-G)** fructose,  
956 electron acceptor, and products concentrations throughout the culturing period for each electron  
957 acceptor (acetate, propionate, *n*-butyrate, *n*-valerate, and *n*-caproate, respectively). Fruc:  
958 fructose; C2: acetate; C3: propionate; C4: *n*-butyrate; C5: *n*-valerate; and C6: *n*-caproate. The

959 initial fructose concentration was  $146.4 \pm 10.3$  mmol C L<sup>-1</sup> and the concentration of the electron  
960 acceptors was  $108.2 \pm 8.0$  mmol C L<sup>-1</sup>. The pH value of the test was  $5.5 \pm 0.02$ . Error bars  
961 represent one standard deviation among triplicate cultures.

962

963 **Figure 4** Production of lactate, *n*-caproate, and H<sub>2</sub> by strain 7D4C2 across a wide pH range  
964 (4.5 to 9.0\*): **A**) comparison of final products (lactate, acetate, and *n*-caproate) and fructose and  
965 *n*-butyrate consumption among experiments at different pH values; and **B**) comparison of final  
966 H<sub>2</sub> production among experiments at different pH values. Bars represent minimum and  
967 maximum values between duplicate cultures. The initial concentrations of fructose and *n*-  
968 butyrate are shown in transparency with a lined pattern. \*Initial pH values in an MES-buffered  
969 system. The lag phase at pH values of 4.5 and 5.0 was slower than the rest of the experiments  
970 (see **Figure S3**).

971

972 **Figure 5** Comparison of *n*-caproate production by strain 7D4C2 with and without product  
973 extraction: **A**) comparison of final products (lactate, acetate, and *n*-caproate) and fructose and  
974 *n*-butyrate consumption between experiments with and without mineral oil and 3% w/v TOPO to  
975 extract products; **B**) comparison of of final H<sub>2</sub> production between experiments with and without  
976 product extraction; **C-D**) fructose, *n*-butyrate, and products concentrations throughout the  
977 culturing period for the experiments without (C) and with product extraction (D). Vertical yellow  
978 lines represent the time-point were the fructose was increased (to increase *n*-caproate  
979 production) and an equal volume of mineral oil with 3% w/v TOPO was added. Error bars  
980 represent one standard deviation among triplicate culture.

981

982 **Figure 6** Whole-genome relatedness analyses: **A**) percentage of conserved proteins (POCP)  
983 pairwise values between selected species within the Clostridiales (heterotypic synonym of  
984 Eubacteriales). The higher the POCP value (green to red), the closer their evolutionary and

985 genetic distance (Qin et al. 2014). The POCP analysis was performed with genomes publicly  
986 available at the NCBI; and **B**) pairwise ANI (average nucleotide identity) and AF (alignment  
987 fraction) values between *C. galactitolivorans* BS-1 and type species (*i.e.*, first accepted species  
988 of a genus) of the *Ruminococcaceae* family (heterotypic synonym of *Oscillibacteriaceae*)  
989 (magenta), *C. fermentans* EA1 (gold), strain 7D4C2 (red), and three closely related unclassified  
990 species (in blue, green, and cyan). The validly published type species information was retrieved  
991 from The NamesforLife Database, as suggested in Barco *et al.*, 2020.

992

993 **Figure 7** Reverse  $\beta$ -oxidation genes for strain 7D4C2 and bacteria with similar genes, as well  
994 as in known *n*-caproate producers: **A**) position of the rBOX genes that cluster together in these  
995 bacteria. The numbers below the arrows indicate the position (base pairs) of the genes for each  
996 bacterium on the right column; and **B**) consensus phylogenetic tree of all 6 rBOX genes that  
997 cluster together\*. Red lines indicate the *Caproiciproducens* clade. Microbial names highlighted  
998 in purple denote *n*-caproate producers, in green are potential *n*-caproate producers, and in blue  
999 *n*-valerate producers. The phylogenetic distances of each of the rBOX genes in these bacteria  
1000 are shown in **Figure S9**. \*As the rBOX genes in the *Megasphaera* species do not cluster, for  
1001 this analysis, we considered the genes most similar to strain 7D4C2.

1002

**Table 1** Differential characteristics of strain 7D4C2 and closely related species: **1** Strain 7D4C2; **2** *Caproicibacter fermentans* (Flaiz et al. submitted); **3** *Caproiciproducens galactitolivorans* BS-1 (Kim et al., 2015a); and **4** [*Clostridium*] *leptum* VPI T7-24-1 (Moore et al., 1976).

| Characteristic                            | 1*                                                                                                              | 2                                                                                                               | 3                                                                                                                            | 4                                                                                                   |
|-------------------------------------------|-----------------------------------------------------------------------------------------------------------------|-----------------------------------------------------------------------------------------------------------------|------------------------------------------------------------------------------------------------------------------------------|-----------------------------------------------------------------------------------------------------|
| Source                                    | Anaerobic reactor                                                                                               | Anaerobic reactor                                                                                               | Anaerobic reactor                                                                                                            | Fecal flora                                                                                         |
| 16S rRNA percent identity, % <sup>a</sup> | -                                                                                                               | 99.51 ± 0.25%                                                                                                   | 94.71 ± 0.35                                                                                                                 | 93.44 ± 0.14                                                                                        |
| POCP, %                                   | -                                                                                                               | 83.4                                                                                                            | 51.9                                                                                                                         | 35.0                                                                                                |
| Cell shape                                | rod                                                                                                             | rod                                                                                                             | rod                                                                                                                          | rod                                                                                                 |
| Cell size (µm)                            | 0.3-0.4 x 1.3-2                                                                                                 | 0.4-0.8 x 1-3                                                                                                   | 0.3-0.5 x 2-4                                                                                                                | 0.6-8.8 x 1.3-2.8                                                                                   |
| Gram stain                                | +                                                                                                               | - <sup>b</sup>                                                                                                  | +                                                                                                                            | +                                                                                                   |
| Spores observed                           | No <sup>c</sup>                                                                                                 | No <sup>c</sup>                                                                                                 | No <sup>c</sup>                                                                                                              | Yes                                                                                                 |
| Optimum pH                                | 6.0                                                                                                             | 7.0                                                                                                             | 6.5-7.5                                                                                                                      | NR                                                                                                  |
| Optimum T                                 | 37-42                                                                                                           | 37                                                                                                              | 40                                                                                                                           | 37                                                                                                  |
| Substrate / Products                      | glucose, fructose / H <sub>2</sub> , CO <sub>2</sub> , acetate, <i>n</i> -butyrate, <i>n</i> -caproate, lactate | fructose / H <sub>2</sub> , CO <sub>2</sub> , acetate, <i>n</i> -butyrate, <i>n</i> -caproate, lactate, ethanol | glucose*, galactitol / H <sub>2</sub> , CO <sub>2</sub> , acetate, <i>n</i> -butyrate, <i>n</i> -caproate, ethanol, lactate* | maltose / H <sub>2</sub> , acetate. Glucose* / H <sub>2</sub> , CO <sub>2</sub> , ethanol*, acetate |
| GC content, %                             | 51.6                                                                                                            | 51.25                                                                                                           | 48.1                                                                                                                         | 50.2                                                                                                |
| Genome length, Mbp                        | 3.95                                                                                                            | 3.9                                                                                                             | 2.58                                                                                                                         | 3.27                                                                                                |

\*Data from this study. NR: not reported.

<sup>a</sup>The 16S rRNA gene percent identity represents an average of the percent identities obtained from the four 16S rRNA gene sequences of strain 7D4C2 extracted from the genome (NCBI PRJNA615378) and the assembly done with Sanger Sequencing (NCBI [MT056029](#)).

<sup>b</sup>Negative staining but cell wall typical of Gram-positive bacteria.

<sup>c</sup>Spores not observed but the genome encodes one or more sporulation genes.

The genomes of *C. fermentans*, *C. galactitolivorans*, and *C. leptum* were downloaded from the NCBI (accession numbers, NZ\_VVXL00000000, [SRMQ00000000](#) and [ABCB00000000](#), respectively). POCP: Percentage of conserved proteins with strain 7D4C2.

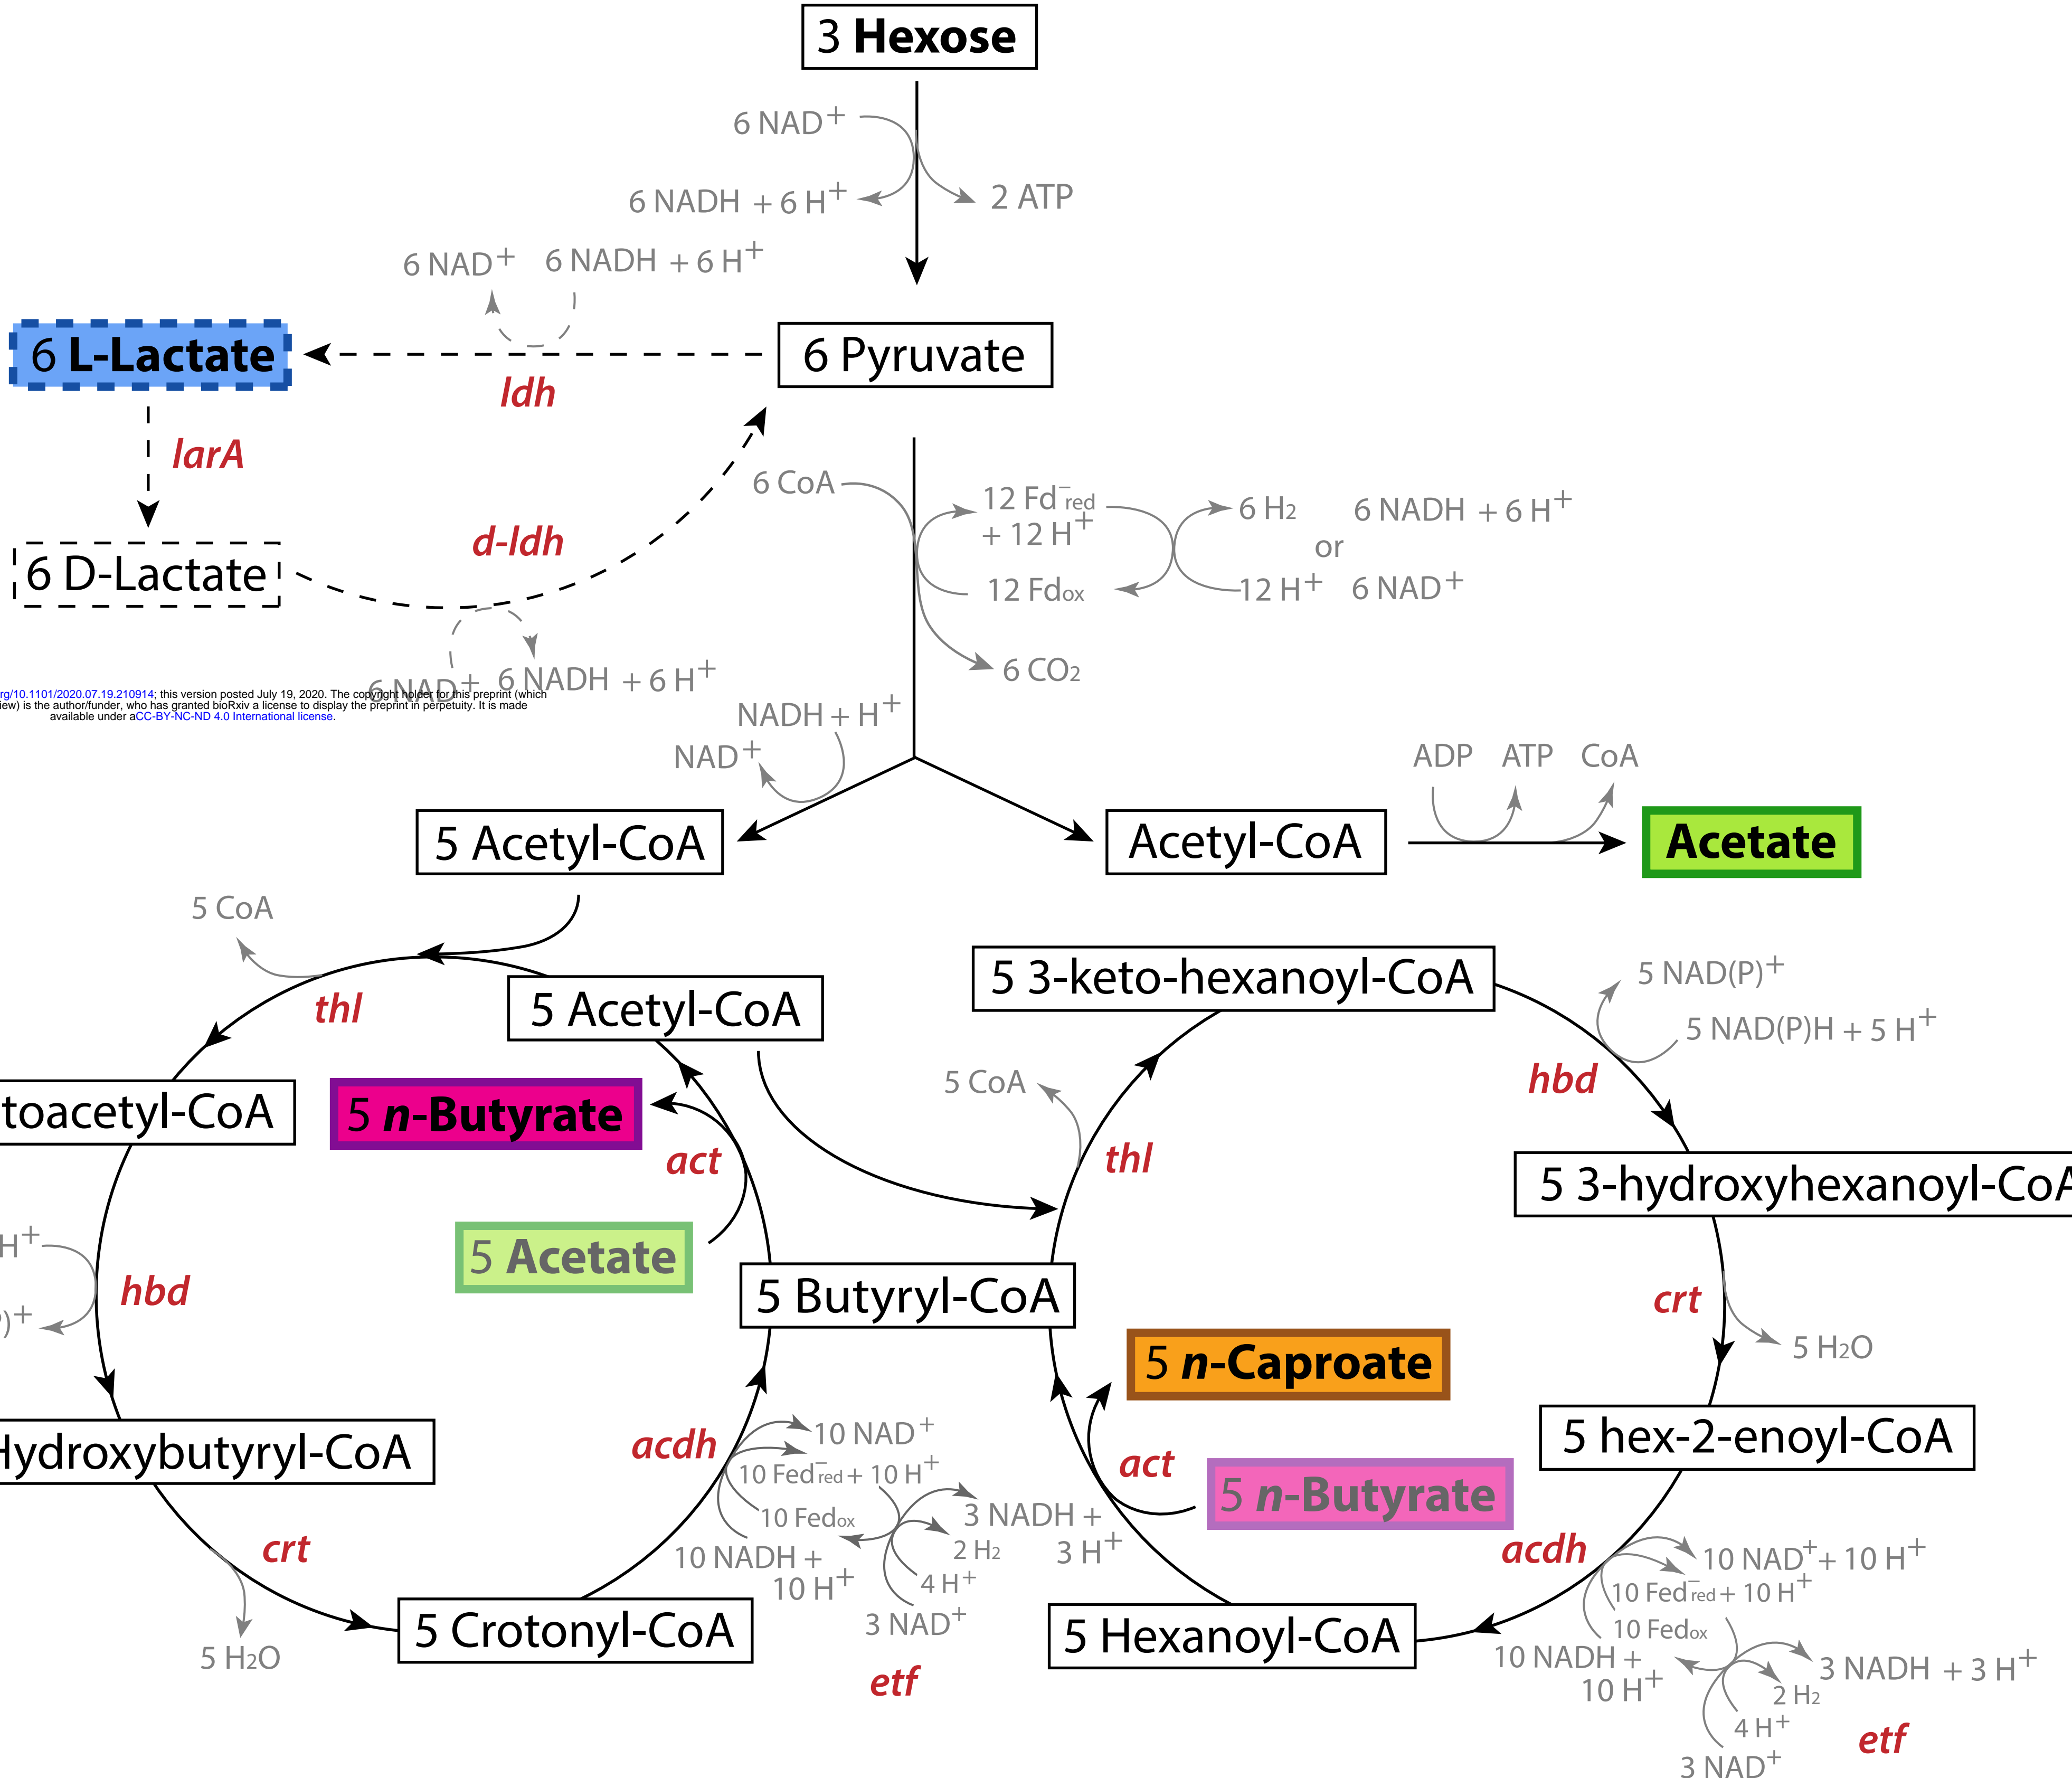

bioRxiv preprint doi: <https://doi.org/10.1101/2020.07.19.210914>; this version posted July 19, 2020. The copyright holder for this preprint (which was not certified by peer review) is the author/funder, who has granted bioRxiv a license to display the preprint in perpetuity. It is made available under aCC-BY-NC-ND 4.0 International license.

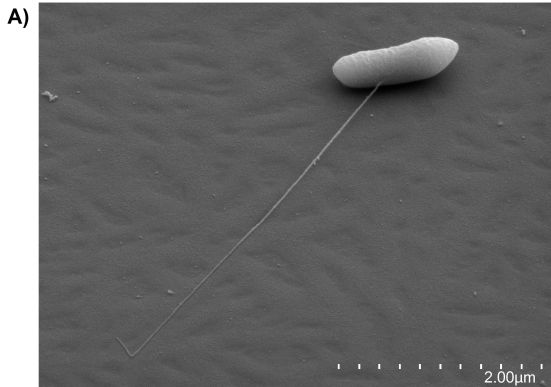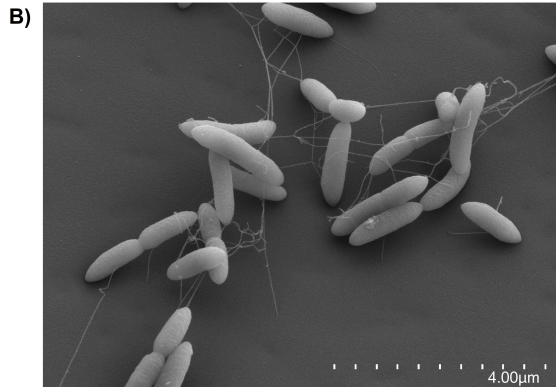

● Fructose ■ Lactate ◆ Acetate ▲ *n*-Butyrate ● *n*-Caproate ◆ OD<sub>600</sub> ▼ H<sub>2</sub>

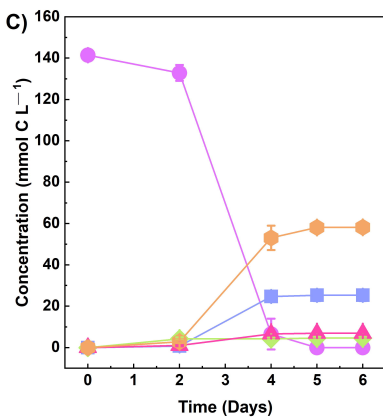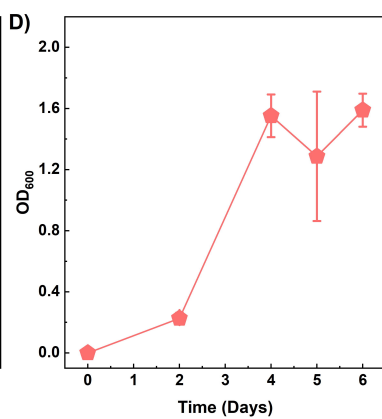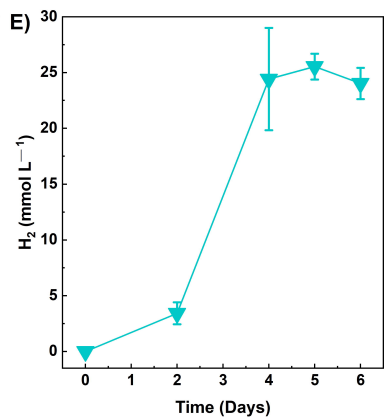

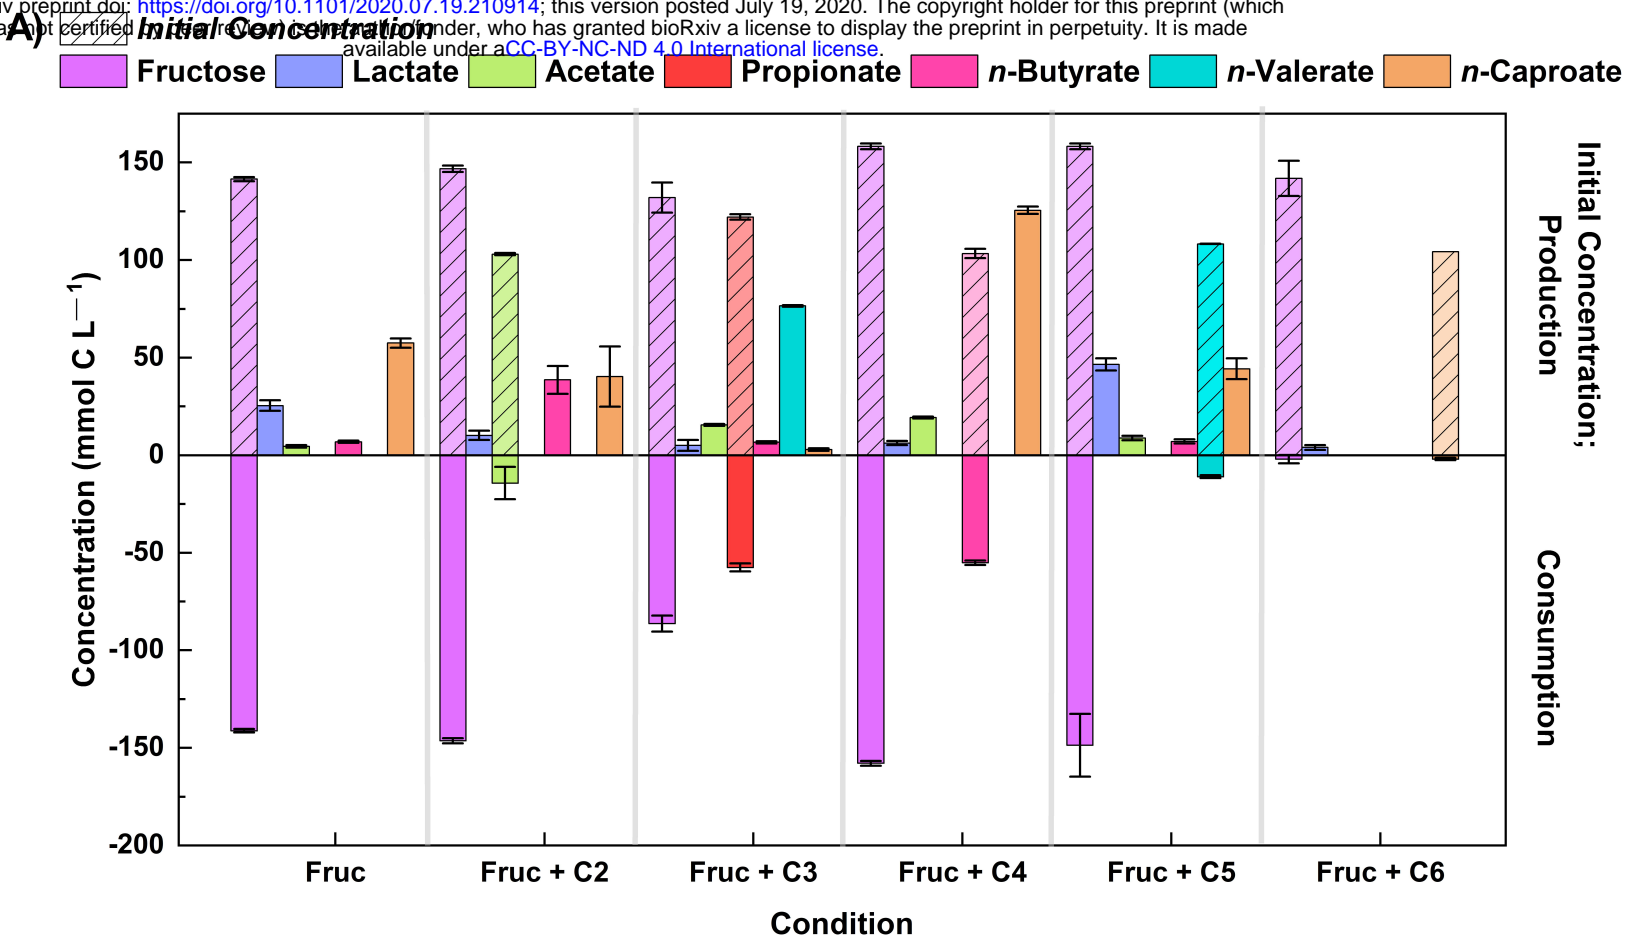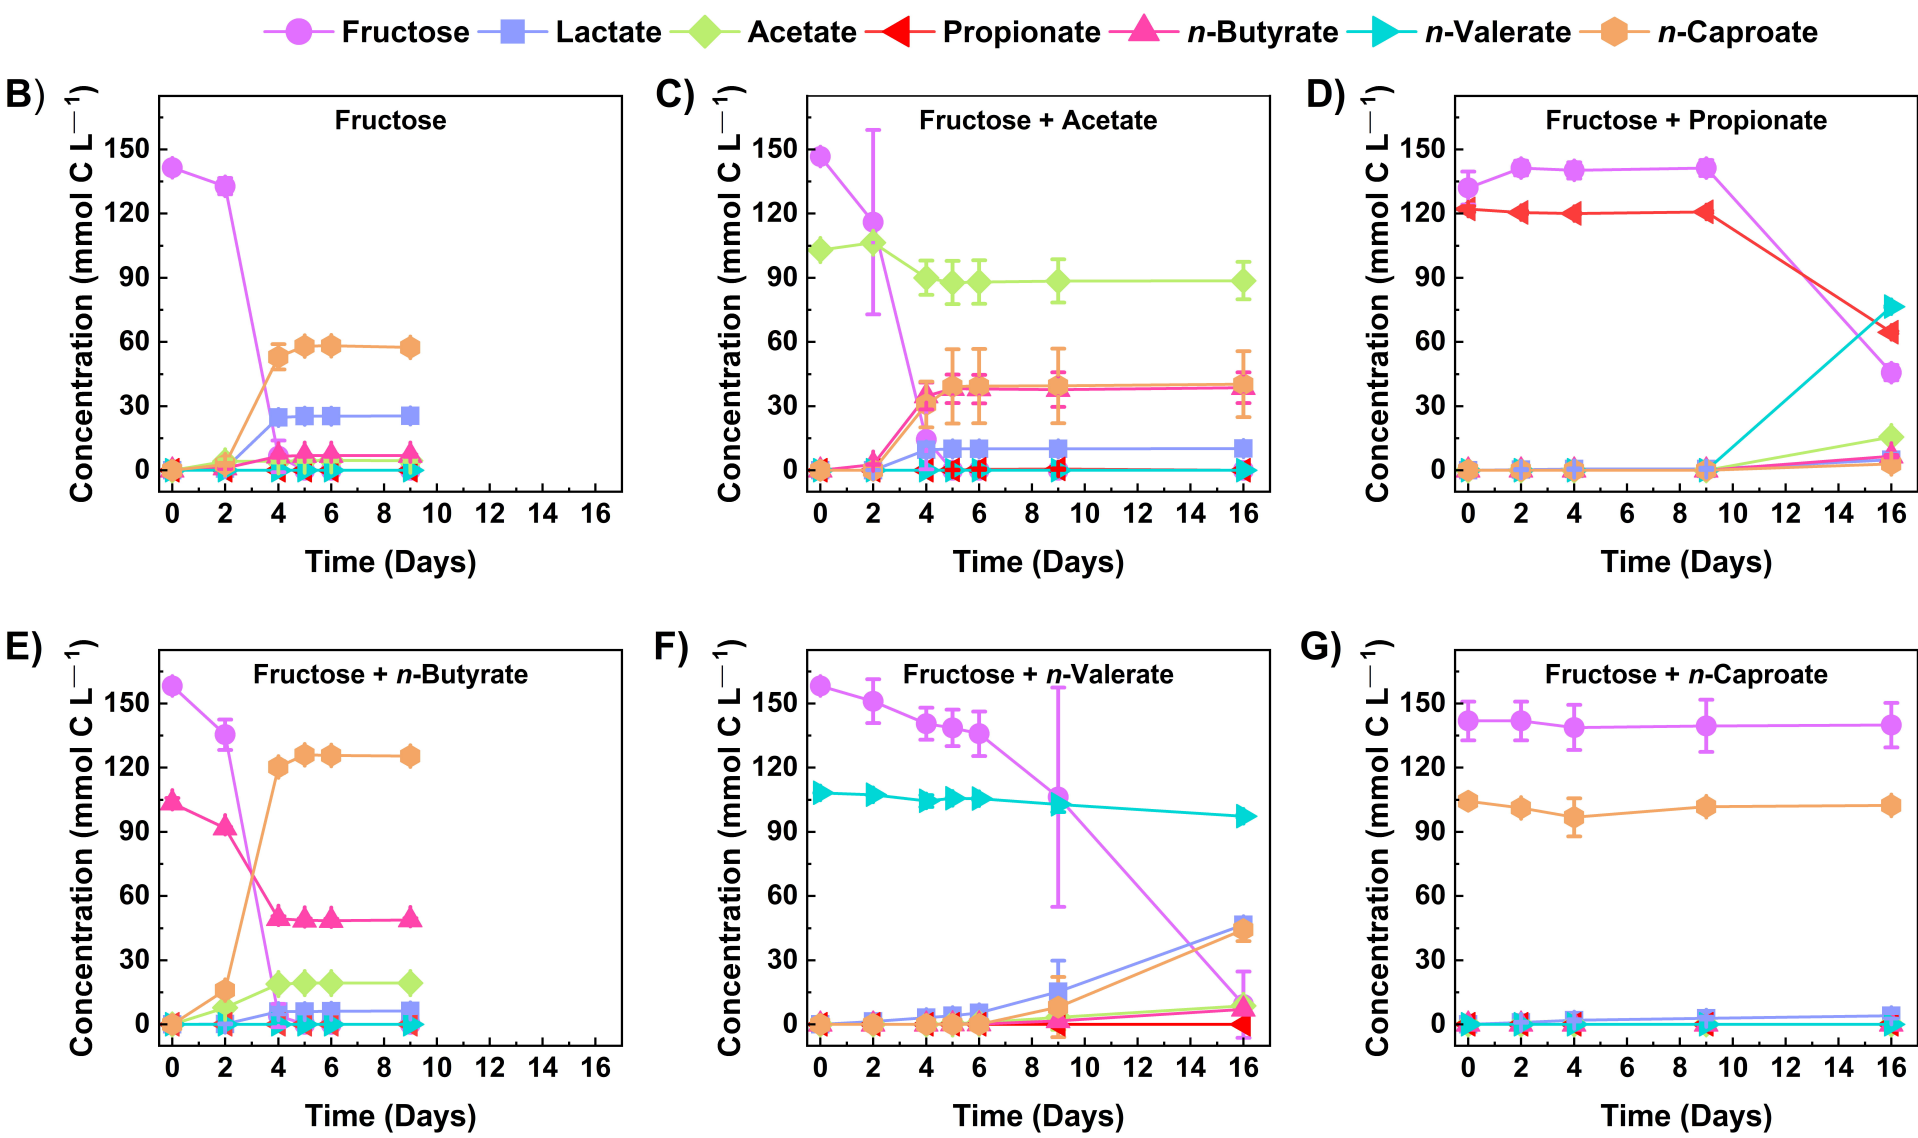



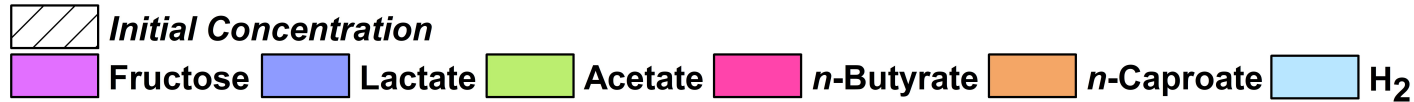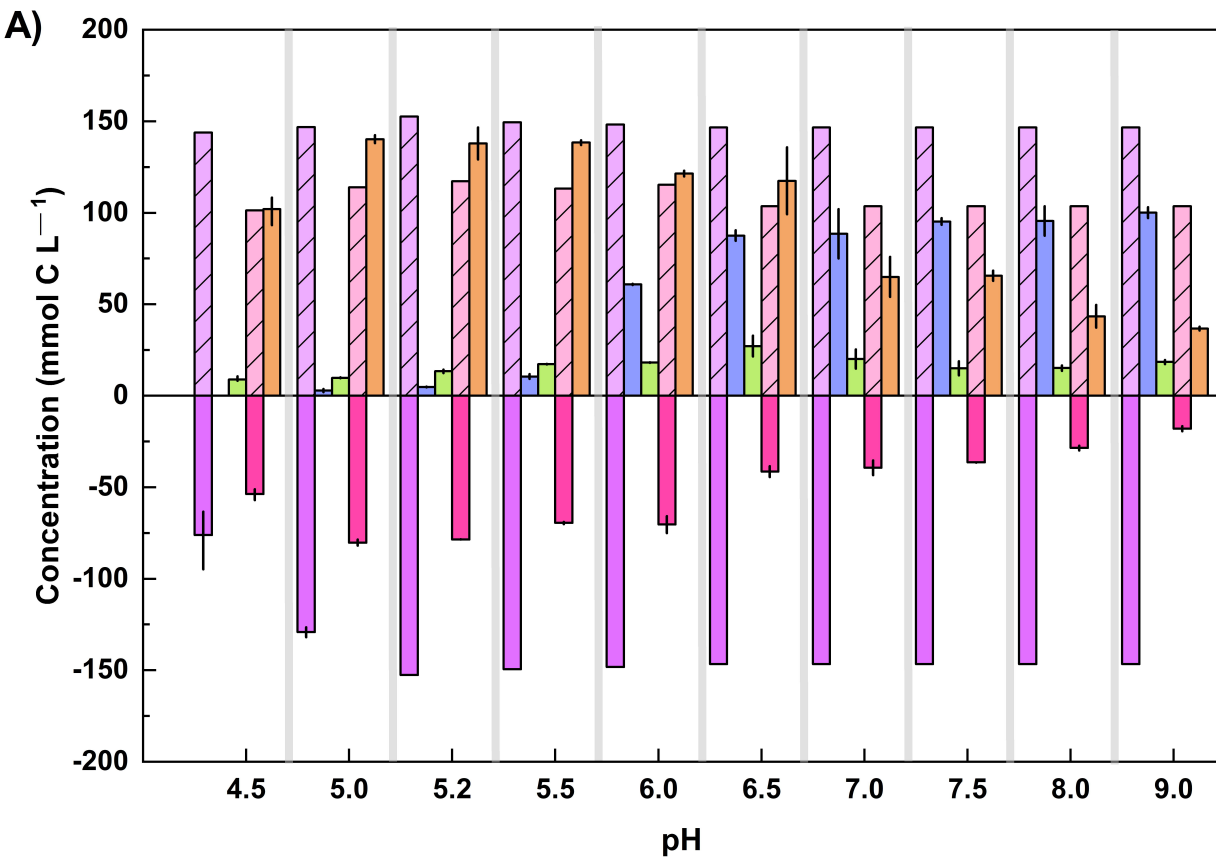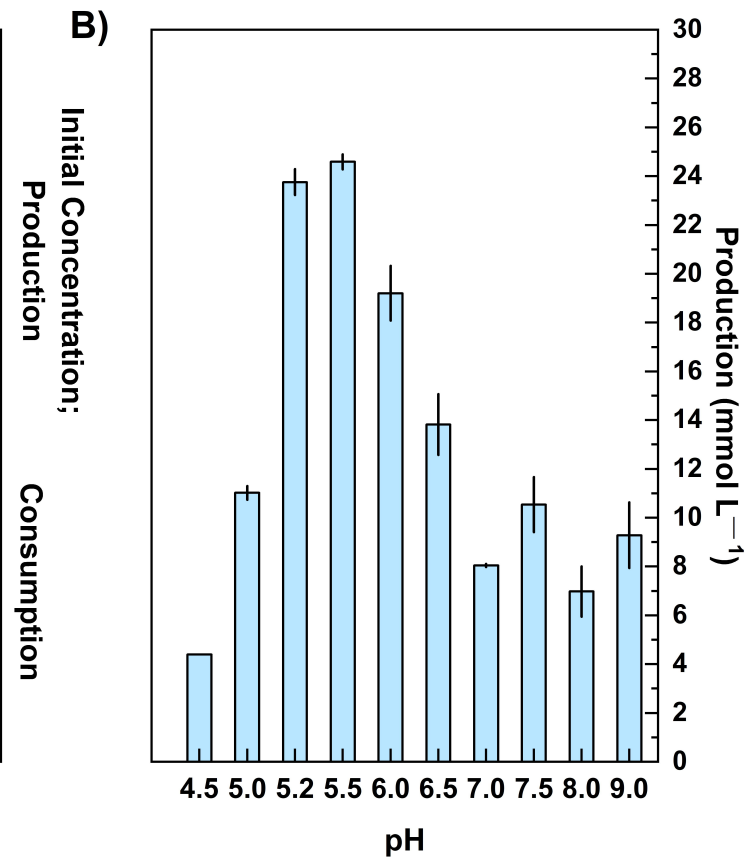

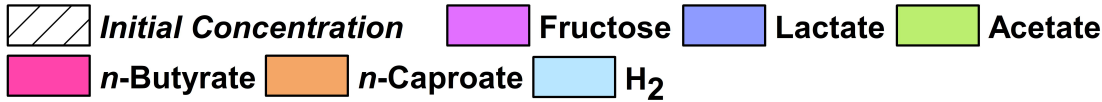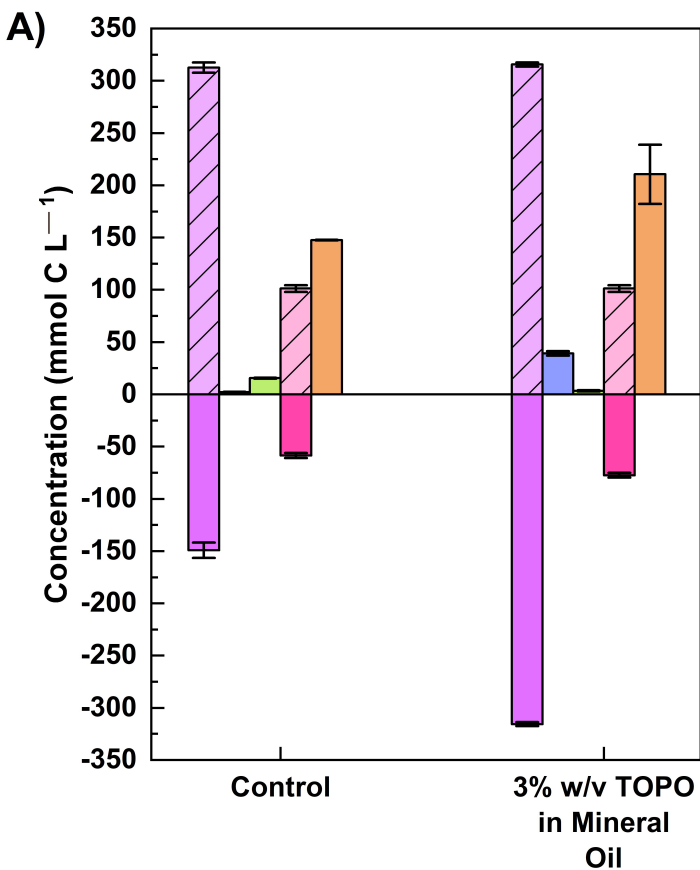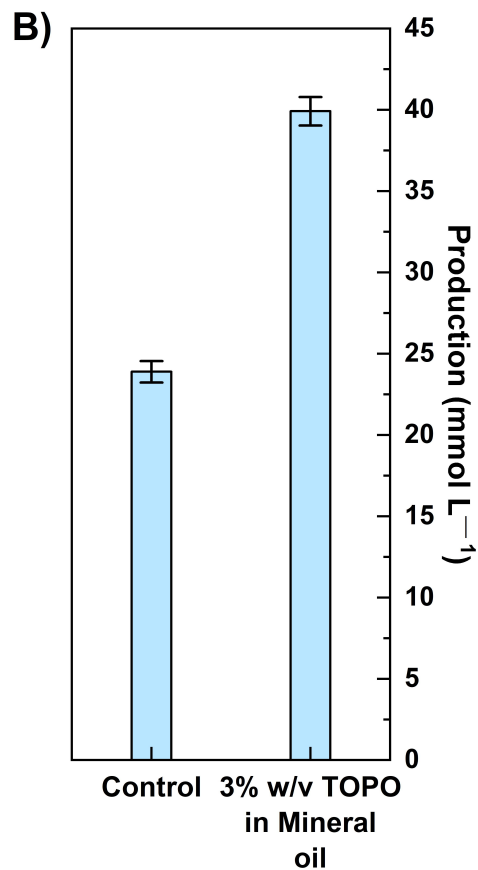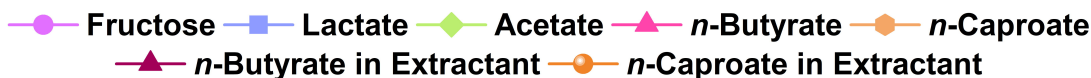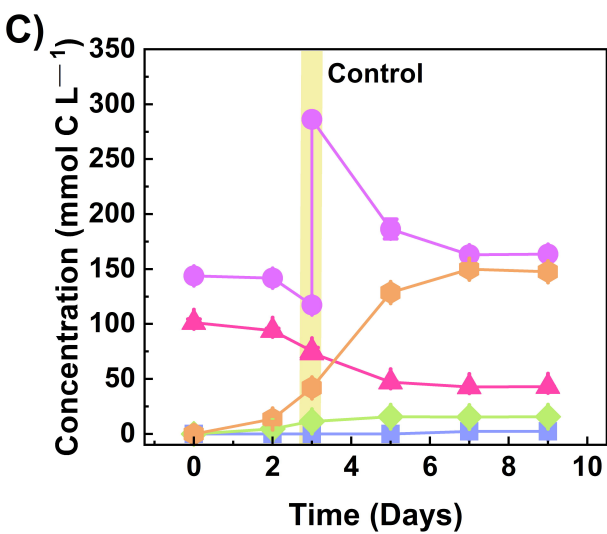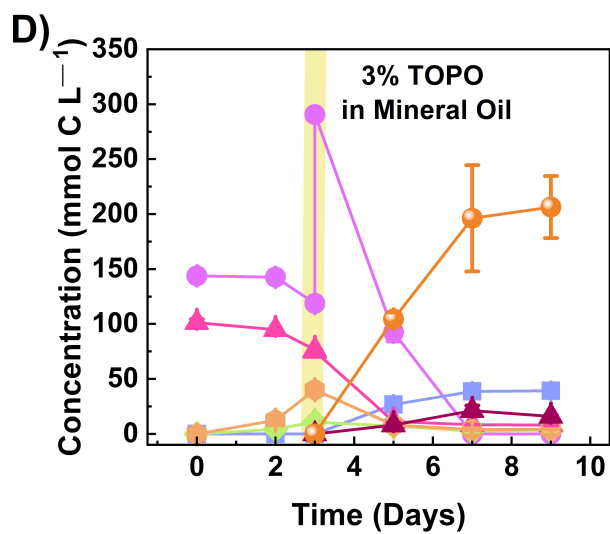

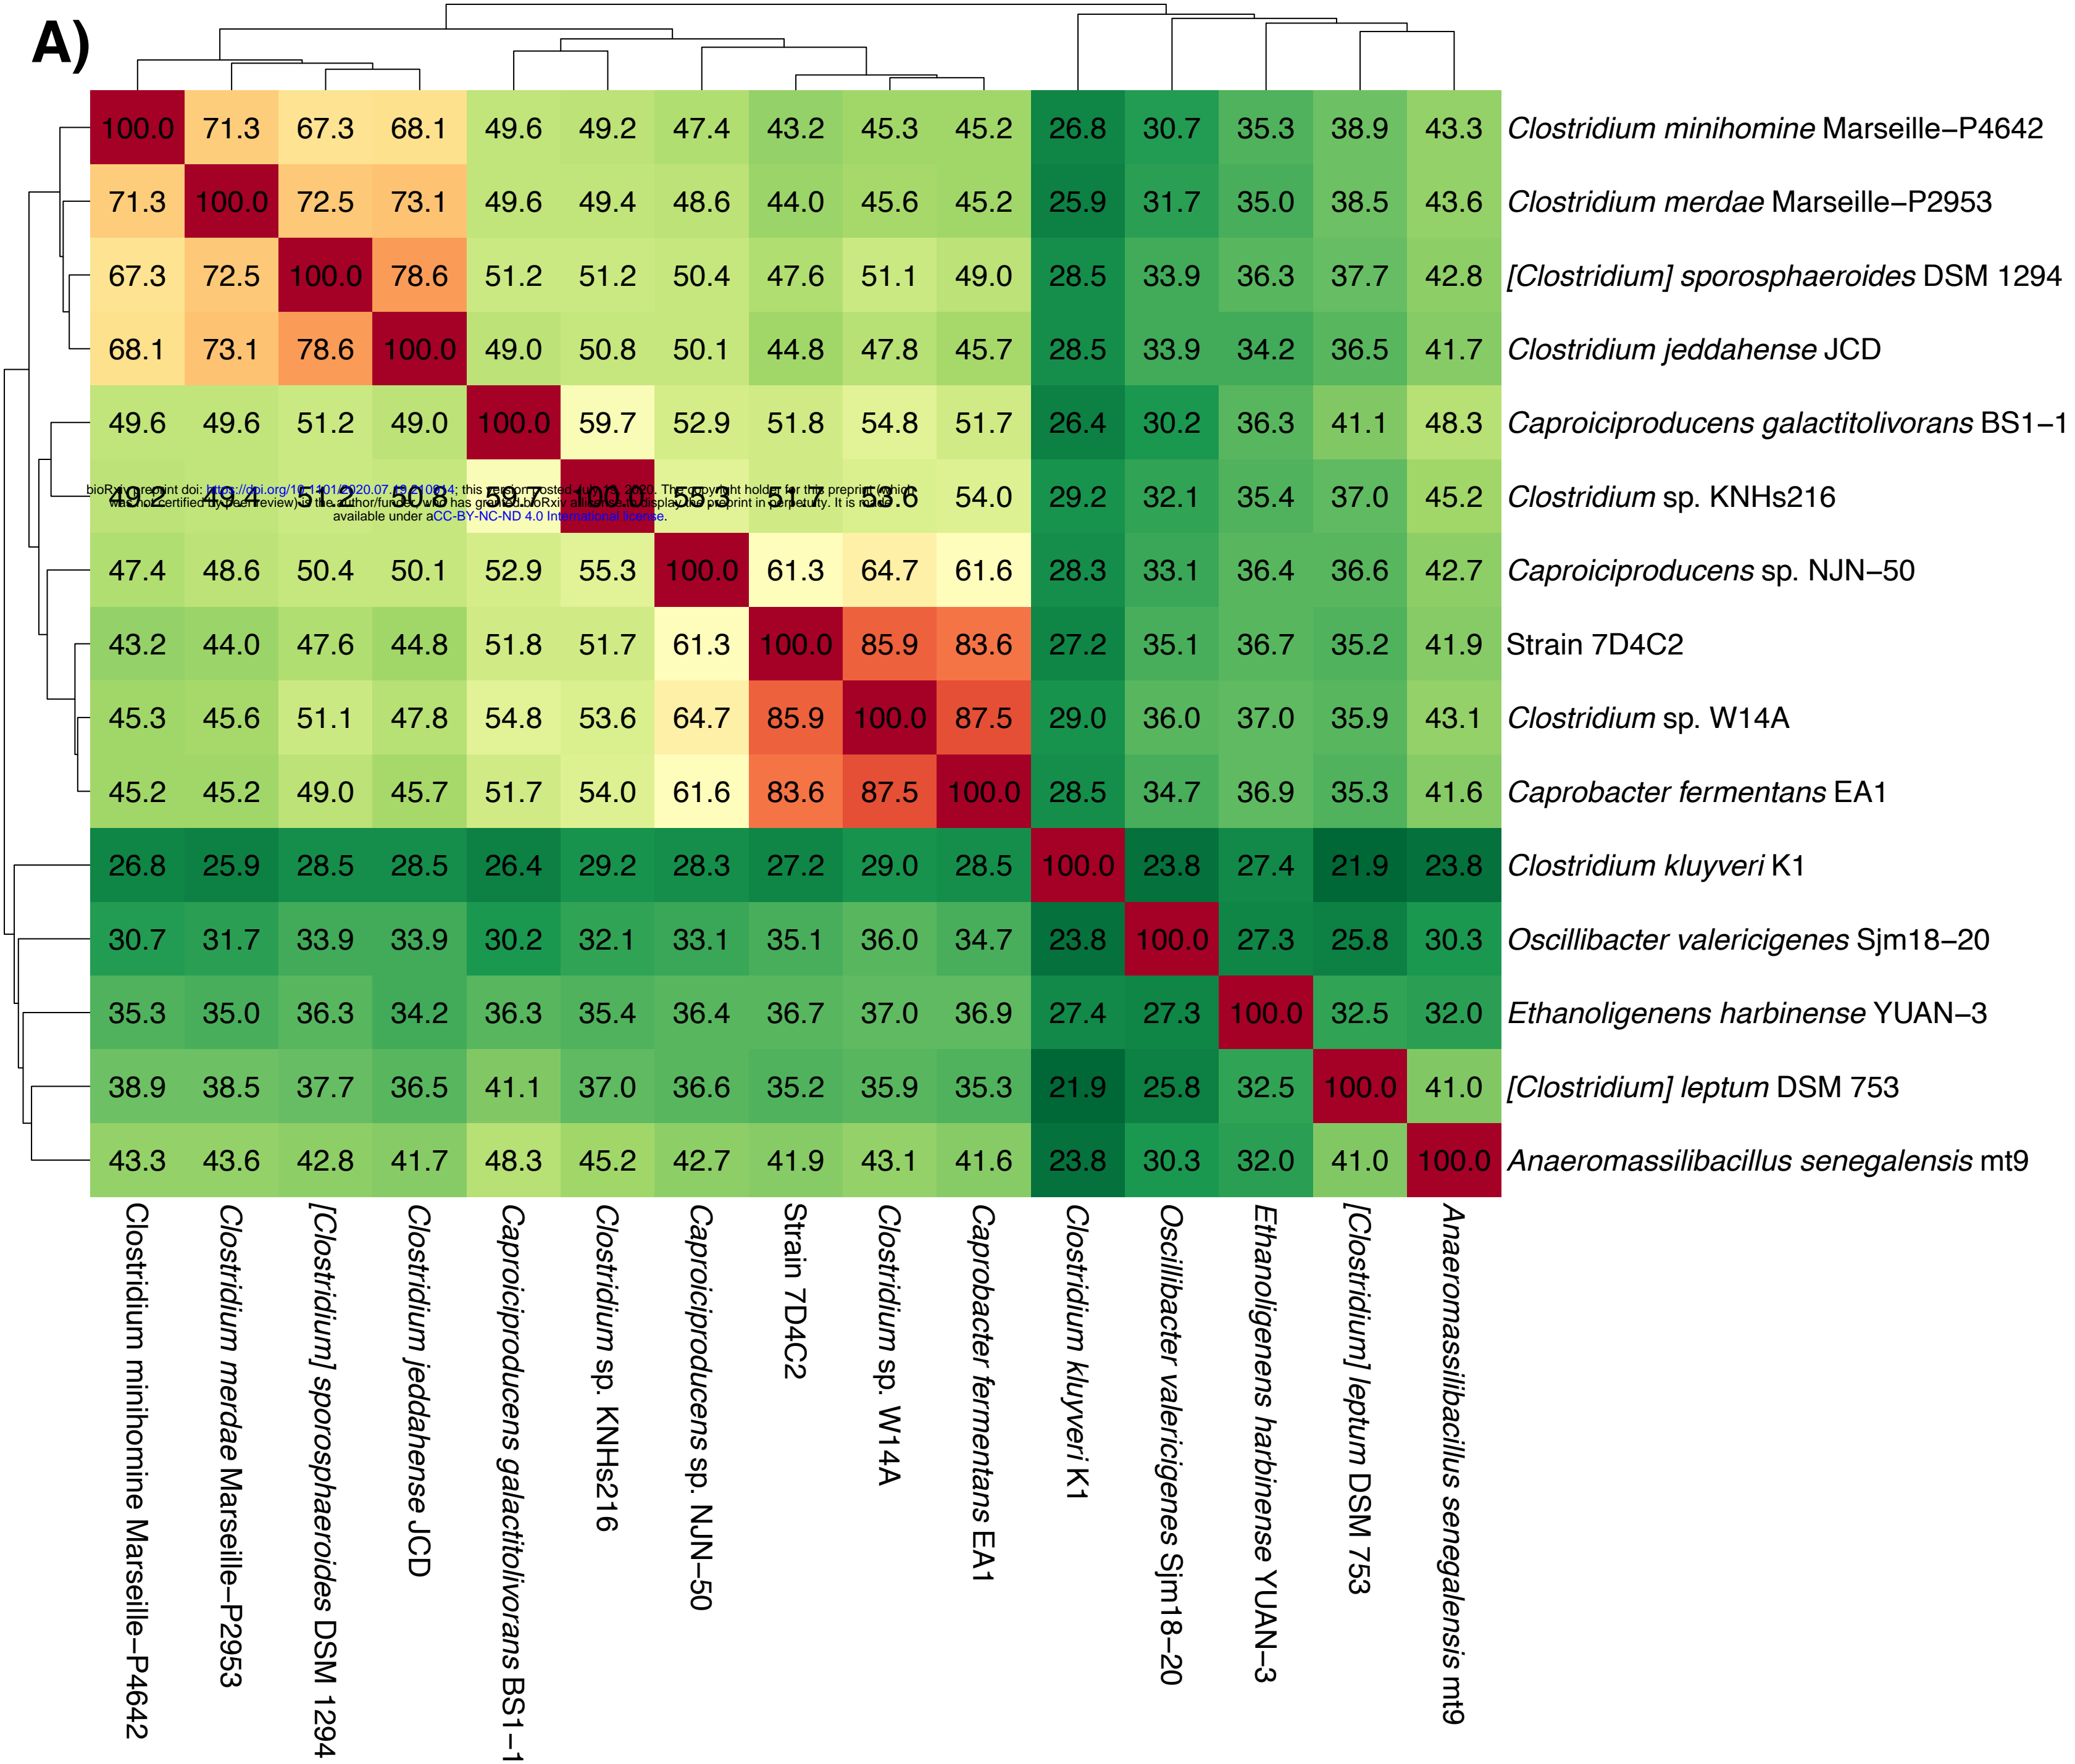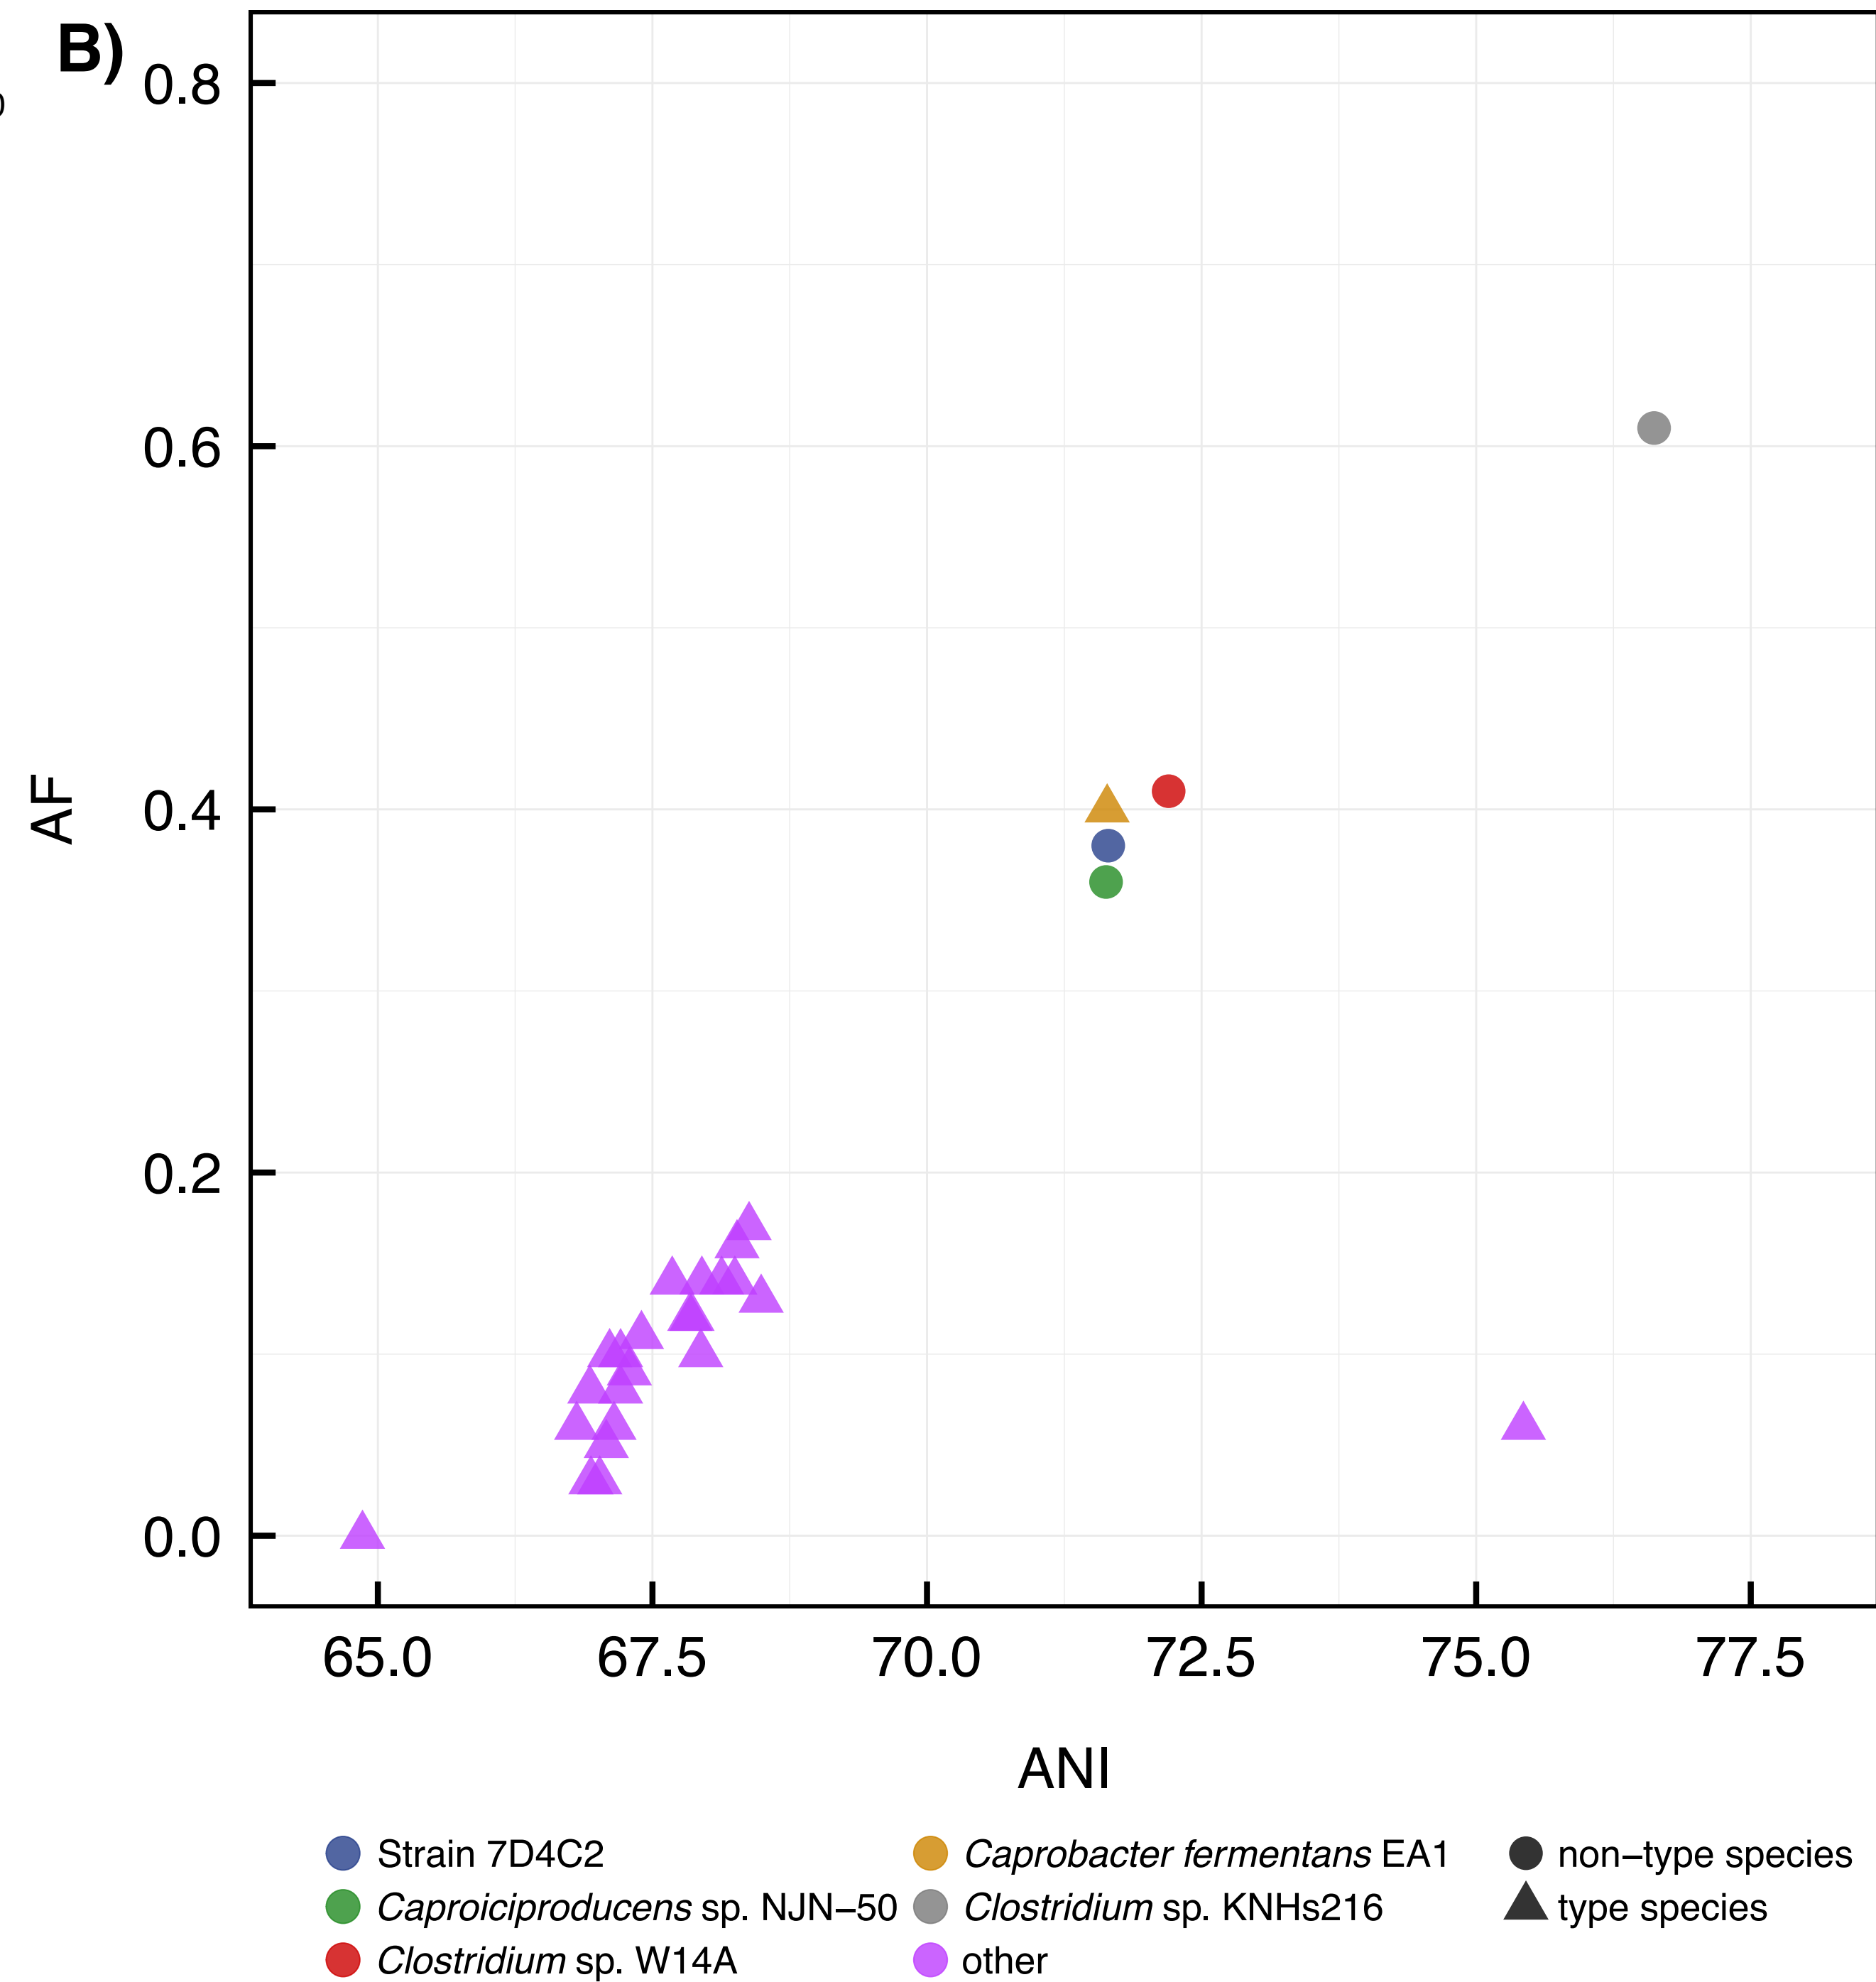

A)

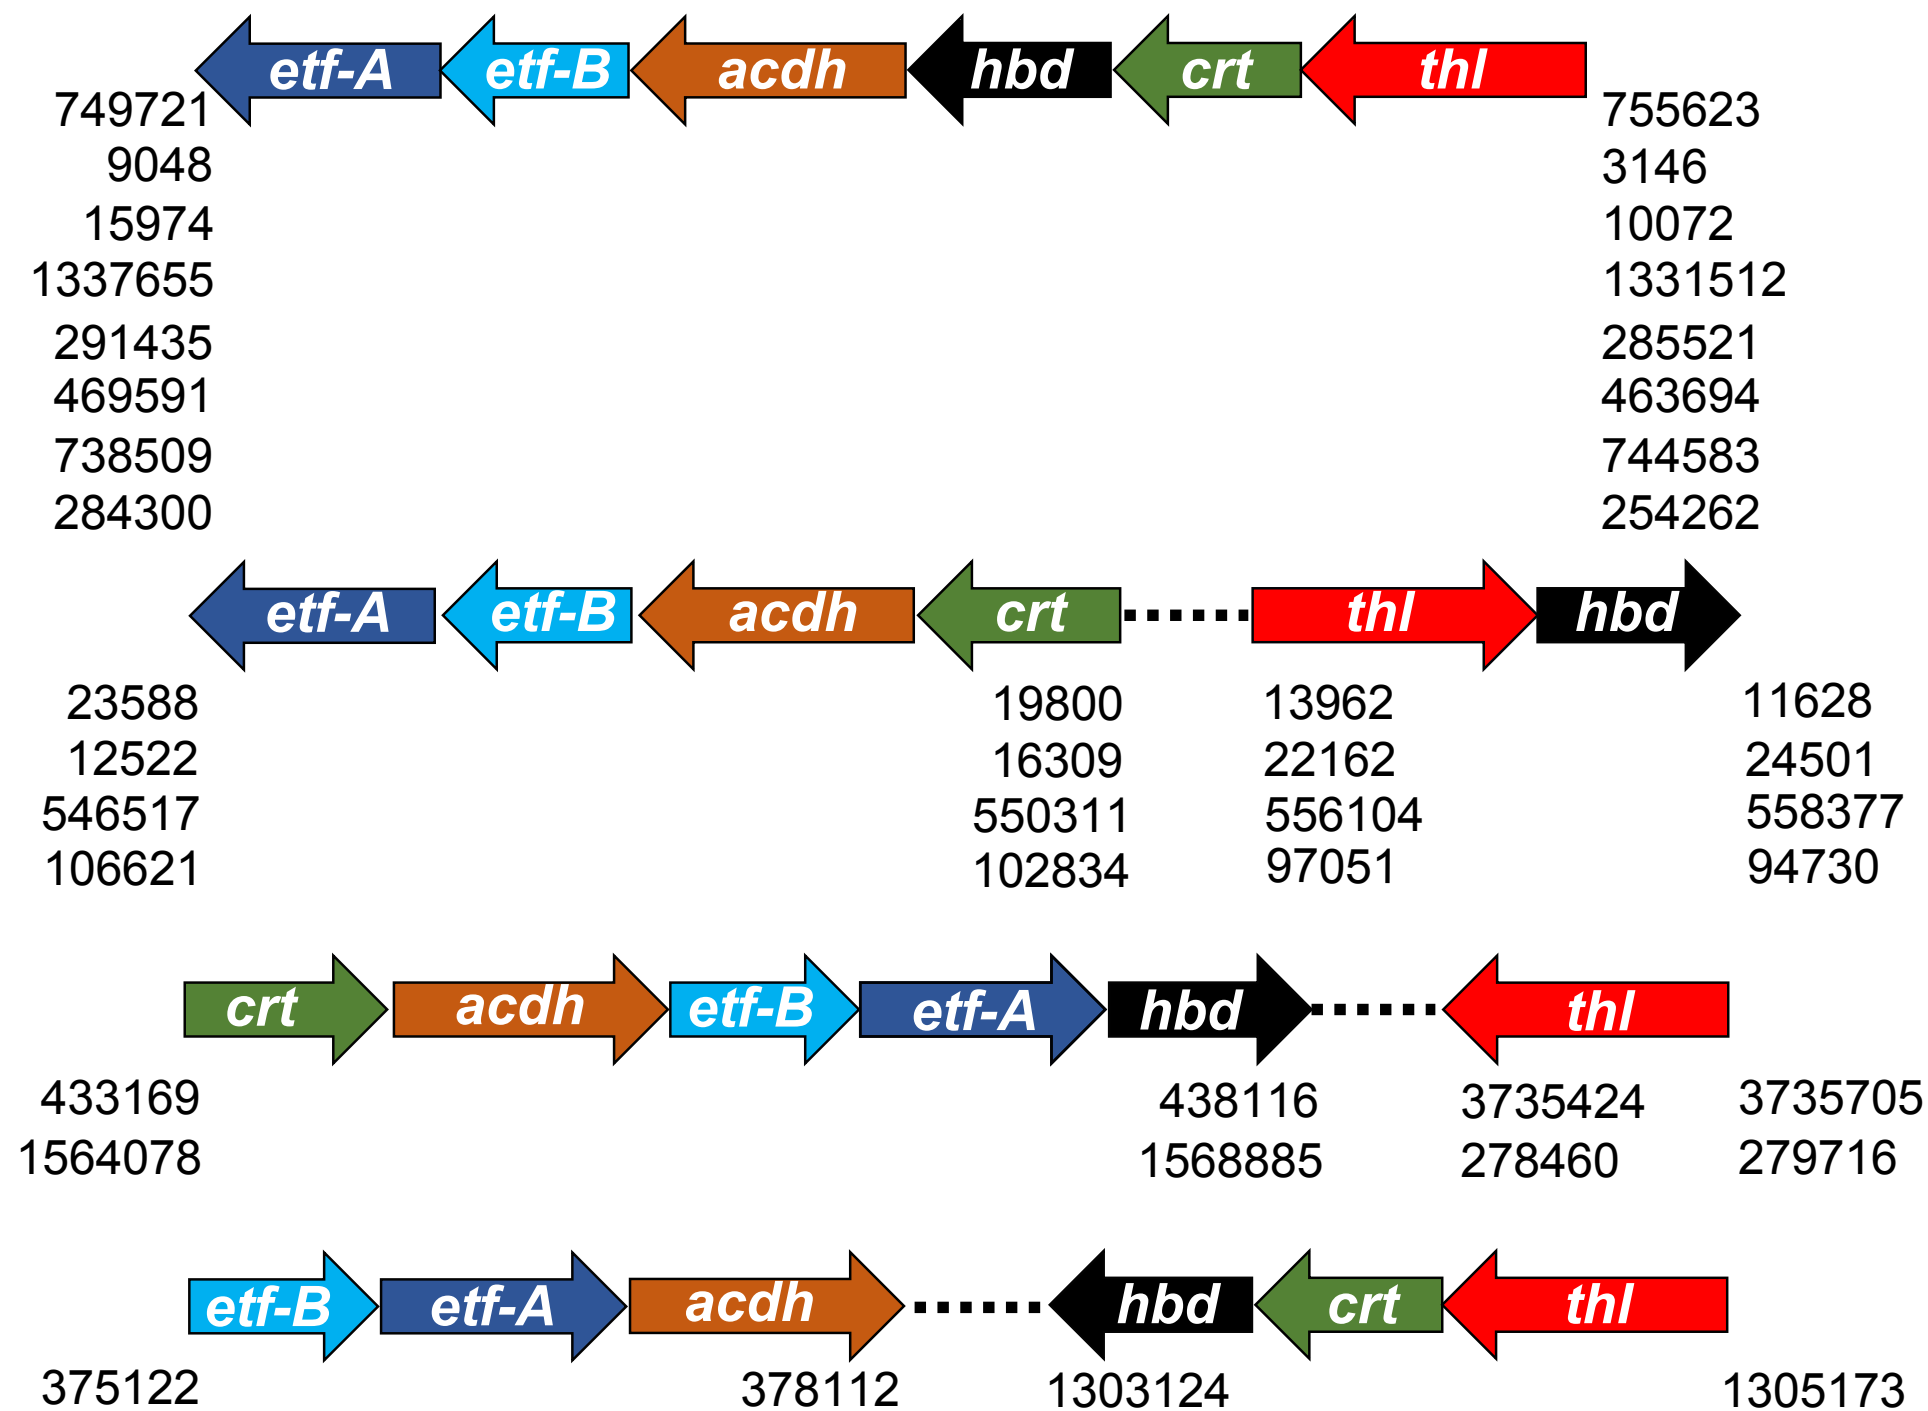

Strain 7D4C2  
Strain W14A  
*C. fermentans* EA1  
Strain NJN-50  
Strain KNHs216  
*C. galactitolivorans* BS-1  
*A. senegalensis* mt9  
*E. limosum* SA11

*C. jeddahense* JCD  
*C. sporosphaeroides* VPI 4527  
*C. minihomine* Marseille P4642  
*C. merdae* Marseille-P2953

*C. kluyveri* K1  
*O. valericigenes* Sjm18-20

Strain CPB6

B)

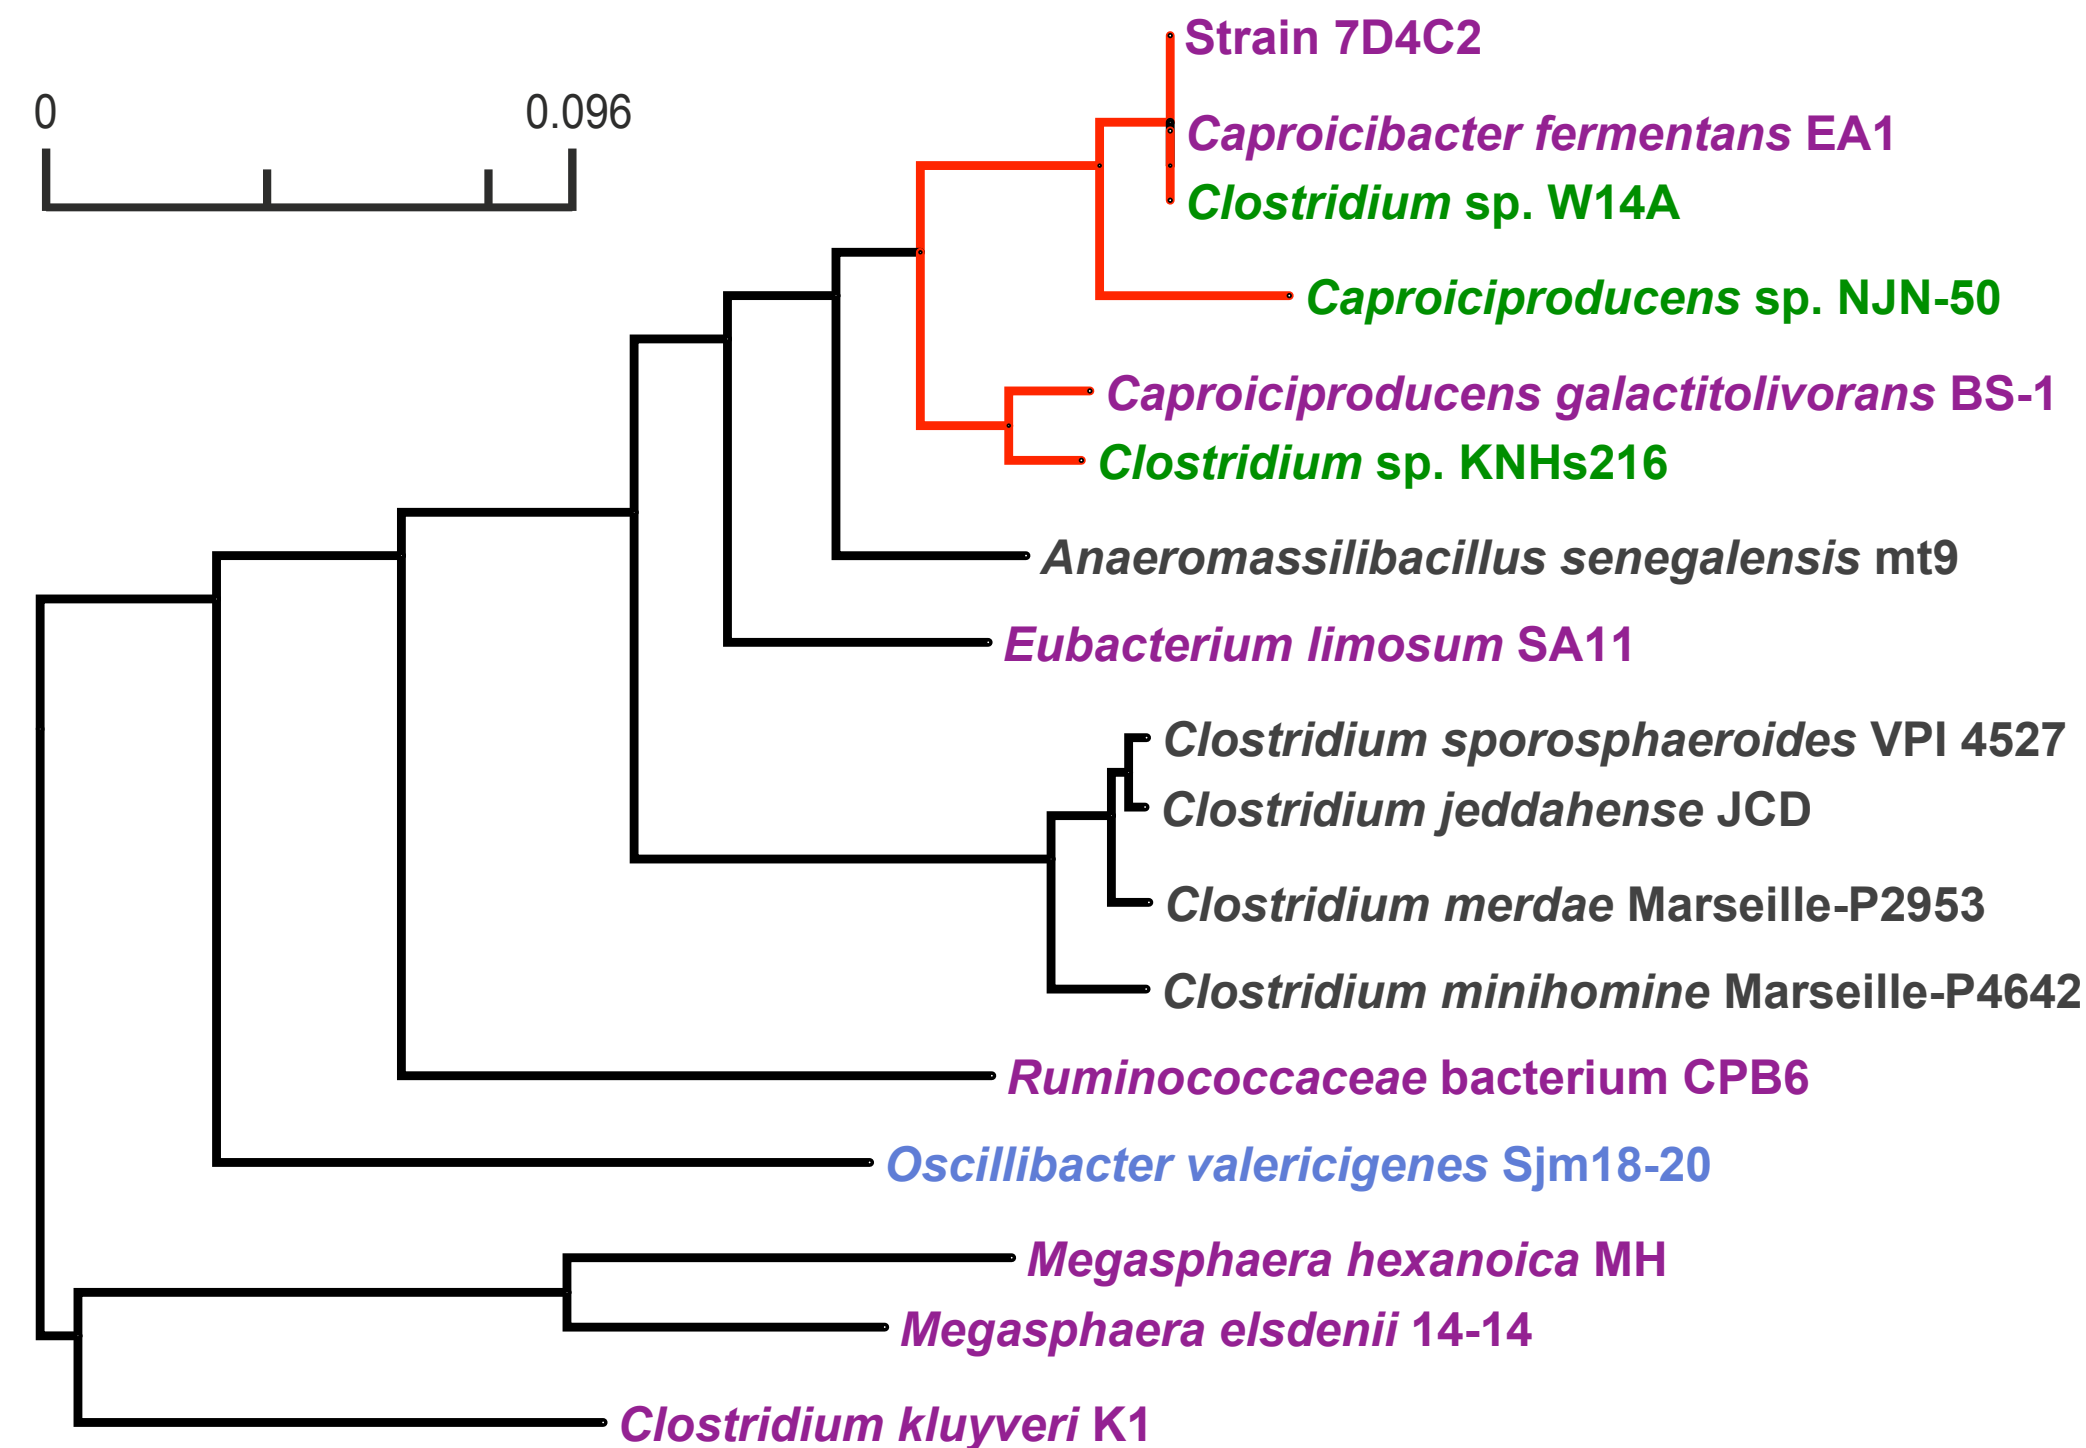

Source: https://www.biorxiv.org/content/10.1101/2020.07.19.210914v1.full.pdf
